# Supplementary material for: XAP5 CIRCADIAN TIMEKEEPER Affects Both DNA Damage Responses and Immune Signaling in Arabidopsis
Source: Front Plant Sci. 2021 Oct 1;12:707923. doi: 10.3389/fpls.2021.707923 (PMC8517334; doi:10.3389/fpls.2021.707923)
Supplement: Supplementary Table 1 — Differential gene expression for xct-1 and xct-2 compared to wild type. [file Table_1.XLSX]

## Sheet: SupTable01
Supplemental Table 1. Differential gene expression for xct-1 and xct-2 compared to wild type.
Expression levels of the indicated genes were compared between the indicated mutants and wild-type Col and significance assessed using edgeR.
Circadian phase and amplitude of genes previously identified as clock-regulated (Hsu and Harmer (2012) PLoS One) are indicated.
gene	logFC.xct1	FDR.xct1	logFC.xct2	FDR.xct2	circ.phase	circ.amp
AT1G01010	-0.52947	0.376293	-0.555697	0.21963	NA	NA
AT1G01020	0.258012	0.634217	0.118624	0.789784	NA	NA
AT1G01030	-0.14321	0.875995	-0.275337	0.611568	NA	NA
AT1G01040	-0.169242	0.678234	-0.311978	0.234055	NA	NA
AT1G01050	-0.000422365	0.999012	-0.037267	0.904857	18	0.102042
AT1G01060	-0.607214	0.0434569	-0.651089	0.00975225	0	1.95273
AT1G01070	0.149229	0.824031	0.292062	0.45321	6	0.111225
AT1G01080	0.103717	0.720431	-0.104833	0.605765	NA	NA
AT1G01090	-0.338067	0.0701178	-0.483378	0.00282947	NA	NA
AT1G01100	0.118104	0.637378	0.33041	0.0383337	NA	NA
AT1G01110	-0.358708	0.691396	-0.741611	0.209541	NA	NA
AT1G01120	-0.290708	0.15736	0.40554	0.0129901	20.5714	0.139308
AT1G01140	0.269084	0.401788	0.185603	0.474147	4	0.298901
AT1G01160	0.199818	0.563849	-0.0851907	0.773517	NA	NA
AT1G01170	0.343961	0.303869	0.508867	0.0433283	NA	NA
AT1G01180	-0.186615	0.713082	0.0191043	0.965719	NA	NA
AT1G01190	0.397928	0.688059	0.0322813	0.973261	NA	NA
AT1G01210	-0.256008	0.684482	0.102488	0.834889	NA	NA
AT1G01220	0.31315	0.339482	0.198183	0.468868	NA	NA
AT1G01225	0.255509	0.823794	-0.129446	0.879629	NA	NA
AT1G01230	0.214009	0.653322	-0.0617561	0.880324	5	0.22522
AT1G01240	0.699043	0.0370456	-0.435354	0.15096	6	0.884837
AT1G01250	-0.0950378	0.913335	0.0743222	0.892388	NA	NA
AT1G01260	0.120941	0.814613	0.244916	0.413234	NA	NA
AT1G01290	0.0511055	0.954211	-0.224999	0.605765	2	0.0981708
AT1G01300	-0.132621	0.792158	0.165997	0.599503	14	0.16609
AT1G01320	-0.22531	0.234238	-0.29914	0.041365	16	0.237244
AT1G01340	-0.309053	0.821285	0.570121	0.437216	NA	NA
AT1G01350	0.264792	0.490343	0.0794844	0.819156	NA	NA
AT1G01360	-0.0188912	0.983023	-0.532441	0.194382	2	0.216573
AT1G01370	-0.167455	0.893764	-0.138471	0.863605	NA	NA
AT1G01390	-0.0290423	0.982607	-1.3151	0.0404377	NA	NA
AT1G01420	-0.0772434	0.891861	0.177863	0.569648	NA	NA
AT1G01430	-0.207112	0.380131	-0.186915	0.300052	6	0.292083
AT1G01440	0.237298	0.486826	0.117507	0.684695	NA	NA
AT1G01448	0.483832	0.731932	0.842887	0.318703	NA	NA
AT1G01470	0.282699	0.373163	0.283577	0.23879	12	0.342965
AT1G01490	0.0395277	0.927937	-0.26267	0.196613	2	0.0715431
AT1G01500	-0.219528	0.721129	-0.000499704	0.999182	8	0.514432
AT1G01510	-0.00759887	0.988126	-0.240445	0.274323	NA	NA
AT1G01520	-1.08285	0.0178679	-2.0046	8.19416e-05	22	1.90823
AT1G01540	-0.0422189	0.927991	-0.274355	0.204399	NA	NA
AT1G01550	-0.0486412	0.884858	-0.034938	0.874951	NA	NA
AT1G01570	-0.697349	0.390885	-0.685296	0.26507	NA	NA
AT1G01580	-0.874597	0.278308	-1.49777	0.0199895	4	0.559687
AT1G01600	-0.333299	0.502976	0.118977	0.775016	NA	NA
AT1G01610	-0.253423	0.308524	-0.124445	0.561655	14	0.108659
AT1G01620	-0.284771	0.121475	-0.112444	0.496761	6	0.101318
AT1G01630	0.132096	0.653322	-0.0493425	0.839806	2	0.0592964
AT1G01640	-0.884117	0.454363	-1.09342	0.214818	NA	NA
AT1G01650	-0.215892	0.539153	-0.0679891	0.822898	12	0.129267
AT1G01690	0.25105	0.838952	0.627404	0.347512	NA	NA
AT1G01710	-0.0693634	0.860492	-0.225941	0.283064	NA	NA
AT1G01720	-0.000910264	0.998385	0.288596	0.147254	NA	NA
AT1G01725	0.0340368	0.977174	-0.693245	0.196874	3	0.175149
AT1G01730	-0.0331908	0.964213	-0.273919	0.41407	NA	NA
AT1G01740	-0.240966	0.778582	-0.492492	0.348378	NA	NA
AT1G01750	-0.232853	0.852309	0.251193	0.741715	NA	NA
AT1G01760	-0.335583	0.759105	-0.11365	0.893538	NA	NA
AT1G01770	0.0698832	0.902589	0.528523	0.0446243	8	0.170322
AT1G01780	0.311391	0.724134	0.124231	0.860604	NA	NA
AT1G01790	0.0173428	0.964213	-0.3448	0.0313654	17	0.255577
AT1G01800	-0.127181	0.70381	-0.110509	0.645446	NA	NA
AT1G01820	0.187567	0.599471	0.448737	0.0505263	10	0.262072
AT1G01830	-0.0977237	0.879229	0.150581	0.693124	NA	NA
AT1G01840	0.687491	0.517558	1.0195	0.15224	NA	NA
AT1G01860	0.453539	0.314301	0.421023	0.228647	NA	NA
AT1G01880	0.48138	0.667838	1.08966	0.103752	NA	NA
AT1G01900	-0.130849	0.800828	-0.267373	0.388101	NA	NA
AT1G01910	0.11793	0.716258	0.272619	0.162659	NA	NA
AT1G01920	-0.0140146	0.986458	-0.117545	0.788395	12	0.250738
AT1G01930	0.239594	0.580704	0.266142	0.385578	NA	NA
AT1G01940	0.431805	0.397642	0.566862	0.125327	NA	NA
AT1G01950	-0.538033	0.0408351	-0.339013	0.111978	NA	NA
AT1G01960	-0.0770546	0.798769	-0.0862411	0.665148	NA	NA
AT1G01970	0.103173	0.797197	0.284682	0.204685	14	0.304665
AT1G01990	-0.32935	0.340365	-0.595112	0.025953	12	0.165424
AT1G02000	-0.486843	0.334815	-0.115332	0.807104	NA	NA
AT1G02010	-0.373135	0.524665	-0.73253	0.0751961	NA	NA
AT1G02020	-0.199373	0.852654	-0.287297	0.662901	NA	NA
AT1G02060	0.354528	0.726501	-0.809658	0.242859	NA	NA
AT1G02080	-0.05432	0.853451	0.110591	0.510475	NA	NA
AT1G02090	0.110154	0.777209	0.142882	0.572416	NA	NA
AT1G02100	-0.0988739	0.828045	0.148388	0.589774	NA	NA
AT1G02110	-0.169064	0.72247	-0.0315652	0.938994	NA	NA
AT1G02120	0.0885479	0.835503	-0.264877	0.265637	NA	NA
AT1G02130	0.00645879	0.990568	-0.205494	0.436423	NA	NA
AT1G02140	-0.0885797	0.803564	0.0825431	0.731969	NA	NA
AT1G02145	0.0285063	0.970449	-0.142471	0.71308	NA	NA
AT1G02150	0.0368905	0.912067	-0.0446119	0.825785	NA	NA
AT1G02160	0.562246	0.538585	0.335396	0.656024	6	0.129353
AT1G02170	-0.0475424	0.952819	-0.307828	0.398679	NA	NA
AT1G02180	0.387068	0.660861	0.716096	0.191011	2	0
AT1G02205	-0.578571	0.0553032	-0.992255	0.000453152	NA	NA
AT1G02220	-0.703379	0.493257	-0.0917554	0.922921	18.8571	0.224051
AT1G02260	-0.528849	0.419323	0.107629	0.856719	15	0.118377
AT1G02270	0.573474	0.0829258	0.363561	0.188464	8	0.105116
AT1G02280	0.385607	0.0545556	0.824683	5.76298e-05	7	0.130188
AT1G02290	-0.536236	0.304166	-0.16843	0.720428	NA	NA
AT1G02300	0.310847	0.570754	0.334525	0.390397	6	0.27789
AT1G02305	-0.0157405	0.972718	-0.0831328	0.71674	NA	NA
AT1G02330	0.189499	0.757243	-0.306487	0.451202	NA	NA
AT1G02335	-0.0117379	0.990568	-0.695827	0.127085	NA	NA
AT1G02340	-0.395057	0.102985	-0.901725	0.000188603	6	0.391863
AT1G02360	-0.454889	0.510504	0.283925	0.580417	NA	NA
AT1G02370	0.174735	0.828045	0.066028	0.911804	NA	NA
AT1G02380	-0.769955	0.265086	-0.95698	0.07684	NA	NA
AT1G02390	0.00271633	0.996825	-0.365098	0.218837	15.4286	0.24184
AT1G02400	0.266595	0.744323	-0.0131803	0.988774	NA	NA
AT1G02410	0.235354	0.554303	0.130599	0.687811	0	0.118978
AT1G02420	0.195879	0.841544	-0.193586	0.771399	NA	NA
AT1G02475	-0.0178229	0.977307	-0.286033	0.302517	14	0.288498
AT1G02500	-0.31969	0.142013	-0.253273	0.148779	14	0.0560026
AT1G02520	-0.119452	0.932266	-0.287022	0.70913	NA	NA
AT1G02560	0.24072	0.225913	0.089227	0.62292	14	0.161562
AT1G02610	0.292582	0.798769	-0.218557	0.794671	4	0.622509
AT1G02640	0.101062	0.843695	0.175778	0.564017	6	0.336109
AT1G02660	0.487208	0.37831	0.175757	0.734821	6	0.0434742
AT1G02680	0.617529	0.257589	0.509015	0.243084	2	0.0635919
AT1G02690	-0.0826167	0.878787	0.299936	0.266724	NA	NA
AT1G02700	-0.927752	0.528692	0.4627	0.648625	NA	NA
AT1G02720	-0.0179027	0.984171	0.0619289	0.908806	NA	NA
AT1G02730	-0.0705203	0.842468	0.280034	0.126454	NA	NA
AT1G02740	-0.0184348	0.986458	-0.000567971	0.999252	NA	NA
AT1G02750	0.0605862	0.909813	0.230217	0.391049	NA	NA
AT1G02780	0.0262167	0.940088	0.0616198	0.745505	NA	NA
AT1G02800	-0.453182	0.731214	-0.570425	0.523745	NA	NA
AT1G02810	-0.230429	0.779599	-0.0230718	0.973472	NA	NA
AT1G02816	-0.627177	0.0174021	-0.337313	0.108602	15.4286	0.106639
AT1G02820	-0.872282	0.00714214	-0.956068	0.000865269	20	1.3011
AT1G02840	0.265304	0.240229	0.135524	0.48665	16	0.153309
AT1G02850	-0.078216	0.890603	0.409778	0.132157	NA	NA
AT1G02860	-0.325244	0.576899	-0.164501	0.727706	8	0.330478
AT1G02870	-0.0226703	0.972952	0.543759	0.039764	NA	NA
AT1G02880	0.424964	0.395026	0.306683	0.444877	NA	NA
AT1G02890	-0.0127445	0.973675	-0.133942	0.445343	14	0.0923749
AT1G02900	0.136847	0.860807	0.186848	0.697174	NA	NA
AT1G02910	0.0562996	0.896793	-0.0821523	0.75473	16	0.224599
AT1G02920	0.718213	0.141152	1.62922	0.000187654	NA	NA
AT1G02930	0.244087	0.734493	1.31138	0.00230718	0	0.359113
AT1G02950	-0.236123	0.796809	-0.138718	0.832296	2	0
AT1G02960	0.446173	0.531937	0.112839	0.864754	NA	NA
AT1G02970	-0.234122	0.852774	0.230101	0.767168	NA	NA
AT1G02990	-0.0897889	0.841578	-0.330492	0.173628	NA	NA
AT1G03000	0.168428	0.605174	0.246336	0.259158	3.42857	0
AT1G03030	-0.12466	0.874972	-0.0286309	0.960857	NA	NA
AT1G03040	-0.142596	0.672252	0.0583725	0.827681	16	0.175285
AT1G03055	-0.186857	0.840869	-0.521156	0.323683	20	0.763112
AT1G03060	-0.15222	0.608888	-0.268221	0.17424	NA	NA
AT1G03080	0.101047	0.740113	-0.228958	0.219396	NA	NA
AT1G03090	0.0708123	0.894714	-0.315501	0.250426	NA	NA
AT1G03100	0.560412	0.597425	-0.0144532	0.991891	NA	NA
AT1G03110	-0.129668	0.796809	-0.0711787	0.84472	NA	NA
AT1G03130	-0.0418113	0.903506	-0.57617	0.00136901	2	0.164015
AT1G03140	0.239329	0.37831	0.267106	0.189382	4	0.136711
AT1G03150	-0.171698	0.662661	0.208651	0.420506	4	0.0469993
AT1G03160	0.307873	0.233277	0.0374464	0.891105	15	0.0982904
AT1G03190	0.0629797	0.931351	0.0866085	0.83838	NA	NA
AT1G03210	-0.644445	0.394157	-0.157281	0.81652	4	0.306401
AT1G03220	-0.306801	0.335637	-0.0385938	0.906395	NA	NA
AT1G03230	-0.118613	0.822572	0.225316	0.457635	12	0.237321
AT1G03250	0.0255067	0.963991	0.0812065	0.781466	NA	NA
AT1G03260	-0.174449	0.799507	-0.411207	0.307445	NA	NA
AT1G03270	0.0184295	0.990374	-0.673293	0.327831	NA	NA
AT1G03280	0.363377	0.417935	0.202145	0.594824	NA	NA
AT1G03290	0.0216631	0.971875	0.17787	0.525914	12	0.149602
AT1G03300	0.667529	0.434496	1.10136	0.0613957	NA	NA
AT1G03310	0.37667	0.109557	0.0899435	0.700992	8.57143	0.168547
AT1G03330	0.366007	0.280141	0.433748	0.0912675	2	0.0448796
AT1G03340	0.477969	0.609512	-0.260412	0.750192	NA	NA
AT1G03350	-0.320407	0.192997	-0.00185792	0.99624	NA	NA
AT1G03360	0.277696	0.551708	0.189208	0.607538	NA	NA
AT1G03365	0.172739	0.730019	-0.0731876	0.855495	NA	NA
AT1G03370	-0.251784	0.497118	0.0399768	0.908762	NA	NA
AT1G03380	-0.298961	0.187445	-0.298351	0.0930022	NA	NA
AT1G03400	-0.420119	0.224476	-0.507042	0.0584852	0	0.145417
AT1G03410	0.412378	0.233845	0.303284	0.279794	NA	NA
AT1G03420	-0.0252222	0.977304	0.381666	0.308495	NA	NA
AT1G03430	0.0366183	0.972952	-0.117505	0.841035	NA	NA
AT1G03440	0.00941705	0.985473	-0.328809	0.146042	NA	NA
AT1G03457	-0.0379569	0.972222	0.42434	0.348658	NA	NA
AT1G03470	-1.12146	0.38898	-0.339757	0.75754	NA	NA
AT1G03475	0.0587904	0.828691	0.146076	0.335236	14	0.148717
AT1G03495	0.0428964	0.96266	-0.352672	0.390812	NA	NA
AT1G03520	0.108622	0.866758	-0.353253	0.323859	NA	NA
AT1G03530	0.0381318	0.970215	0.351493	0.415954	NA	NA
AT1G03540	0.426579	0.776553	-0.223341	0.853885	NA	NA
AT1G03550	0.377491	0.726501	-0.19679	0.82243	NA	NA
AT1G03560	-0.387328	0.757598	-0.215971	0.816012	NA	NA
AT1G03590	0.0345778	0.955729	-0.287303	0.295576	2	0.140268
AT1G03600	0.0123998	0.975871	-0.380168	0.0260953	2	0.152757
AT1G03610	0.0271484	0.955729	-0.55396	0.00962215	20.5714	0.0957586
AT1G03630	0.260452	0.228566	-0.357871	0.0339044	NA	NA
AT1G03650	-0.425029	0.730766	-0.042191	0.967572	NA	NA
AT1G03680	0.0919142	0.743449	-0.209063	0.219232	16	0.168992
AT1G03687	0.0148079	0.985068	-0.0496147	0.916744	NA	NA
AT1G03730	-0.473253	0.622512	0.247642	0.731481	NA	NA
AT1G03740	0.238285	0.386584	0.343093	0.085603	10	0.305908
AT1G03750	-0.181002	0.83423	-0.228668	0.683097	NA	NA
AT1G03760	0.0259754	0.982678	0.200386	0.751244	NA	NA
AT1G03770	0.180657	0.880519	0.438696	0.49922	NA	NA
AT1G03780	-0.054608	0.955729	0.0425056	0.943127	NA	NA
AT1G03820	0.102046	0.871817	-0.48357	0.149167	0	0.16888
AT1G03830	0.666666	0.263486	0.771682	0.0886786	NA	NA
AT1G03850	-0.375267	0.551708	-0.24597	0.616571	4	0.283248
AT1G03860	0.0619757	0.892812	0.292675	0.19466	12	0.178839
AT1G03870	-0.425408	0.247193	0.201558	0.514743	NA	NA
AT1G03900	-0.00917834	0.986797	0.201063	0.418416	NA	NA
AT1G03905	0.178411	0.913749	0.339515	0.713832	NA	NA
AT1G03910	0.418467	0.234238	0.389736	0.159549	NA	NA
AT1G03930	-0.183767	0.606402	-0.422822	0.0722584	8	0.157547
AT1G03940	-0.392405	0.498745	-0.747166	0.0700141	NA	NA
AT1G03950	-0.334771	0.696144	-0.0137395	0.988742	6	0.0897718
AT1G03960	0.0399238	0.971875	-0.354402	0.507982	NA	NA
AT1G03970	0.0219916	0.979823	-0.214276	0.622023	6	0.182826
AT1G03980	0.0163806	0.989364	-0.669286	0.227661	NA	NA
AT1G04000	0.207337	0.797169	0.154134	0.785559	18	0.153032
AT1G04010	-0.212618	0.757208	-0.186378	0.700862	16	0.132144
AT1G04020	-0.0876003	0.8769	0.109238	0.752796	12	0.250086
AT1G04030	0.0942221	0.942636	0.38203	0.545	NA	NA
AT1G04040	0.0234996	0.979088	0.429631	0.25362	NA	NA
AT1G04050	-0.476626	0.730944	-0.888879	0.323507	NA	NA
AT1G04070	0.217201	0.809682	0.67115	0.163156	NA	NA
AT1G04080	0.0477083	0.879229	0.396875	0.0116905	15	0.147856
AT1G04100	0.641237	0.411171	-0.222488	0.771774	20.5714	0.0528966
AT1G04110	0.145152	0.827093	-0.336189	0.39238	NA	NA
AT1G04120	-0.139034	0.584896	-0.0491128	0.819423	NA	NA
AT1G04130	-0.100308	0.890985	0.0755317	0.872959	NA	NA
AT1G04140	-0.0812585	0.775404	-0.0126521	0.957969	NA	NA
AT1G04160	-0.129087	0.879229	0.0330833	0.957808	NA	NA
AT1G04170	-0.0266156	0.945878	0.25095	0.130321	14	0.0361241
AT1G04190	0.142197	0.731836	-0.16325	0.571737	NA	NA
AT1G04200	-0.615843	0.112648	-0.884735	0.00792816	NA	NA
AT1G04210	0.0387601	0.931832	0.0667592	0.792049	NA	NA
AT1G04220	-0.650356	0.276776	-0.0429056	0.94682	16	0.0447234
AT1G04230	-0.0743376	0.938545	-0.159321	0.768023	NA	NA
AT1G04240	-0.139724	0.731369	-0.412132	0.0934031	4	0.304545
AT1G04250	-0.38286	0.115361	-0.336213	0.086677	2	0.27001
AT1G04260	0.219108	0.665689	-0.0567147	0.8981	NA	NA
AT1G04270	-0.102653	0.671171	0.215128	0.156062	NA	NA
AT1G04280	0.243741	0.447513	-0.104996	0.71188	6	0.291708
AT1G04290	-0.315494	0.338361	-0.301535	0.236635	NA	NA
AT1G04295	-0.401717	0.672711	-0.459168	0.486996	NA	NA
AT1G04300	0.0193829	0.972952	-0.0655472	0.831143	NA	NA
AT1G04310	-0.0483509	0.972952	0.452722	0.460487	NA	NA
AT1G04340	-0.074218	0.935334	0.349489	0.398895	NA	NA
AT1G04350	-0.00882309	0.982405	-0.284243	0.0989192	20	0.274173
AT1G04360	-0.159094	0.901423	-0.188692	0.811378	NA	NA
AT1G04390	0.561339	0.257197	0.295071	0.497409	NA	NA
AT1G04400	0.291687	0.209065	0.137242	0.49689	10	0.296801
AT1G04410	0.0118337	0.976554	0.324894	0.0498442	NA	NA
AT1G04420	-0.146321	0.552561	-0.479169	0.00593829	NA	NA
AT1G04430	-0.158569	0.528397	-0.127402	0.503748	NA	NA
AT1G04440	0.172787	0.55298	0.0999536	0.67174	10	0.154362
AT1G04480	0.0772583	0.852981	0.343946	0.104192	NA	NA
AT1G04510	0.00313489	0.993828	0.212912	0.246384	NA	NA
AT1G04520	-0.00422027	0.994489	-0.177443	0.569648	20	0.192868
AT1G04530	-0.0105015	0.982209	-0.572448	0.00557888	0	0.462653
AT1G04550	-0.216519	0.523384	-0.229217	0.349072	17.5385	0.185694
AT1G04555	0.509174	0.575117	0.0165594	0.989027	2	0.0801224
AT1G04590	0.246106	0.565373	0.111951	0.756092	NA	NA
AT1G04610	-0.757845	0.5045	-0.2811	0.764338	NA	NA
AT1G04620	-0.392792	0.429476	-0.221427	0.586321	14	0.324611
AT1G04630	0.157368	0.725067	0.0910447	0.787293	NA	NA
AT1G04635	-0.0777665	0.962174	0.0570723	0.953334	NA	NA
AT1G04640	0.119428	0.797491	0.27071	0.309868	NA	NA
AT1G04650	-0.357409	0.645879	-0.210411	0.726333	NA	NA
AT1G04680	-0.37669	0.070005	-0.103108	0.593913	NA	NA
AT1G04690	0.31479	0.0976453	0.176188	0.273096	8	0.110008
AT1G04700	-0.473349	0.706681	0.408808	0.618427	NA	NA
AT1G04710	-0.668124	0.0752067	-1.18139	0.000866999	18	0.404052
AT1G04730	-0.0782172	0.937709	0.187989	0.719749	NA	NA
AT1G04750	-0.180624	0.469083	-0.114746	0.567236	6	0.130778
AT1G04770	0.11281	0.892812	0.13125	0.800954	NA	NA
AT1G04780	0.341983	0.265936	0.164536	0.545	10	0.209438
AT1G04790	0.143656	0.769964	0.184873	0.565023	NA	NA
AT1G04800	0.413778	0.704311	-0.0233223	0.984288	NA	NA
AT1G04810	0.0569685	0.881904	0.237665	0.219602	NA	NA
AT1G04820	0.175767	0.489993	0.69411	0.000490731	14	0.315582
AT1G04830	0.0534849	0.934448	0.219791	0.47736	12	0.010095
AT1G04850	0.334863	0.118811	0.0818932	0.702085	8.57143	0.00670467
AT1G04860	0.151805	0.702062	0.26591	0.285283	14	0.0982406
AT1G04870	-0.224133	0.54476	-0.09842	0.749178	NA	NA
AT1G04900	0.303202	0.62966	0.660119	0.0917141	10	0.188136
AT1G04910	0.120601	0.799507	-0.095922	0.775016	NA	NA
AT1G04920	0.618812	0.579381	0.352474	0.702698	NA	NA
AT1G04930	0.206114	0.908747	-0.194912	0.867912	NA	NA
AT1G04940	0.260757	0.429787	0.228282	0.367361	NA	NA
AT1G04945	-0.0649086	0.882488	0.244942	0.268665	NA	NA
AT1G04950	0.196974	0.655609	0.084881	0.81281	NA	NA
AT1G04960	0.202677	0.609601	-0.110868	0.736053	NA	NA
AT1G04970	0.0218382	0.968138	0.00425803	0.991891	NA	NA
AT1G04980	0.580357	0.313116	0.883207	0.0377227	10.2857	0.239386
AT1G04985	0.535545	0.211961	-0.0961207	0.833518	NA	NA
AT1G04990	0.16068	0.850912	0.0818478	0.891311	14	0.312058
AT1G05000	0.430413	0.588179	0.963371	0.0536153	NA	NA
AT1G05010	-0.489056	0.0287282	-0.834024	0.000158512	10	0.109269
AT1G05030	-0.356447	0.495178	-0.454562	0.224095	NA	NA
AT1G05055	0.175513	0.749147	0.418915	0.19249	0	0
AT1G05060	0.116964	0.902049	0.254136	0.633522	NA	NA
AT1G05070	0.170665	0.736218	-0.0757554	0.851549	NA	NA
AT1G05090	-0.330977	0.54345	-0.228052	0.589323	NA	NA
AT1G05100	-0.25444	0.894942	0.403166	0.70322	NA	NA
AT1G05120	0.215388	0.677907	-0.162884	0.685339	NA	NA
AT1G05140	-0.107899	0.684436	-0.157578	0.364109	16	0.237914
AT1G05150	-0.11332	0.745542	-0.0823027	0.746642	NA	NA
AT1G05160	-0.129088	0.89792	-0.44985	0.3996	NA	NA
AT1G05170	-0.257557	0.406408	-0.717159	0.00351955	22	0.403841
AT1G05180	0.102667	0.833599	0.0600855	0.862112	10	0.0478825
AT1G05190	0.110007	0.639021	0.0728704	0.686789	NA	NA
AT1G05200	0.335425	0.156119	0.0346412	0.893538	18	0.0226807
AT1G05205	0.386785	0.413306	0.629022	0.0603634	NA	NA
AT1G05210	-0.159637	0.881661	0.288916	0.633788	4	0.138719
AT1G05230	0.0444966	0.950465	-0.256091	0.441692	NA	NA
AT1G05240	-0.928279	0.325113	0.506424	0.459415	NA	NA
AT1G05250	-0.013752	0.993361	1.20862	0.0651515	NA	NA
AT1G05260	-0.542634	0.349869	-0.216327	0.669852	NA	NA
AT1G05270	0.460675	0.0648659	0.328386	0.109628	NA	NA
AT1G05300	1.70224	0.15349	2.04698	0.0272546	NA	NA
AT1G05310	-0.108215	0.945356	-0.671763	0.378986	NA	NA
AT1G05320	0.0778974	0.885927	-0.445647	0.112083	NA	NA
AT1G05340	0.120609	0.943364	0.517323	0.517105	10	0.252649
AT1G05350	-0.0487082	0.940088	-0.199194	0.54568	NA	NA
AT1G05360	0.290263	0.460093	0.0250095	0.953123	NA	NA
AT1G05380	0.239284	0.570439	0.113377	0.747496	13	0.0891705
AT1G05385	0.41085	0.235536	0.0413223	0.914301	NA	NA
AT1G05410	0.232866	0.592772	0.441896	0.118595	NA	NA
AT1G05430	0.177345	0.73124	0.462746	0.125916	NA	NA
AT1G05440	0.326314	0.807425	0.67007	0.379562	NA	NA
AT1G05460	-0.189604	0.686753	0.00342282	0.995306	NA	NA
AT1G05470	-0.263451	0.350252	-0.648709	0.00425246	NA	NA
AT1G05500	0.0354766	0.939626	-0.0840704	0.743685	NA	NA
AT1G05520	-0.311567	0.27034	-0.22313	0.323332	NA	NA
AT1G05540	-1.24795	0.248829	-1.70041	0.0516718	18	0.908357
AT1G05560	0.241449	0.35786	0.175036	0.406788	14	0.349632
AT1G05562	0.0124322	0.982209	-0.0582136	0.848403	NA	NA
AT1G05570	-0.348704	0.306893	0.0220322	0.953606	NA	NA
AT1G05590	0.000933632	0.998895	-0.293907	0.382884	NA	NA
AT1G05600	0.44853	0.369374	0.891277	0.013959	NA	NA
AT1G05620	0.20992	0.688514	0.151957	0.698594	8	0.0671031
AT1G05630	0.17079	0.810671	-0.0655719	0.904144	NA	NA
AT1G05640	0.238345	0.848591	-0.109379	0.905526	NA	NA
AT1G05660	-1.89353	0.154681	-0.223293	0.844895	18	0.203535
AT1G05670	-0.351615	0.666604	-0.350637	0.548848	NA	NA
AT1G05680	0.424955	0.541694	-0.428261	0.434907	NA	NA
AT1G05690	-0.491808	0.265086	-0.667921	0.051508	20	0.483191
AT1G05700	-0.634199	0.48483	-0.797445	0.226641	NA	NA
AT1G05710	-0.161304	0.861917	0.192299	0.734083	0	0.0963579
AT1G05720	0.236596	0.673854	0.287114	0.450362	4	0.130155
AT1G05750	0.15251	0.878787	-0.185567	0.773783	14	0
AT1G05760	0.129093	0.946763	-0.512894	0.615245	4	0.132283
AT1G05780	-0.284615	0.830183	-0.339032	0.694337	NA	NA
AT1G05785	-0.50778	0.611295	-0.170389	0.835405	NA	NA
AT1G05790	0.371023	0.452773	0.16588	0.702279	NA	NA
AT1G05805	0.971055	0.0549878	0.867633	0.0372425	8	0.343454
AT1G05810	0.304057	0.713138	0.658939	0.180813	20.5714	0.0525672
AT1G05830	0.0218992	0.97054	-0.0512565	0.875166	NA	NA
AT1G05835	0.254265	0.619678	0.340268	0.326219	NA	NA
AT1G05840	-0.300715	0.424309	-0.527868	0.0544466	NA	NA
AT1G05850	-0.236664	0.237378	-0.400398	0.0114945	NA	NA
AT1G05860	-0.05199	0.960053	-0.0559269	0.927511	NA	NA
AT1G05870	0.112625	0.769964	0.117288	0.654241	0	0.116605
AT1G05890	0.0861984	0.820798	0.0753942	0.769406	10	0.0211431
AT1G05900	0.203871	0.692147	-0.654183	0.0526563	22	0.10698
AT1G05910	0.0310455	0.958333	0.0243771	0.946559	NA	NA
AT1G05940	0.16618	0.67638	0.0995294	0.747614	NA	NA
AT1G05950	0.218069	0.816732	0.106238	0.876816	NA	NA
AT1G05960	-0.20026	0.478077	-0.243821	0.229335	14	0.22039
AT1G05970	0.37792	0.581547	0.265862	0.621936	2	0.167522
AT1G06000	-0.0796586	0.851208	0.168029	0.480143	18	1.20521
AT1G06002	-0.0429419	0.955729	0.303871	0.359256	NA	NA
AT1G06010	-0.317417	0.599826	-0.064054	0.904857	2	0.0359646
AT1G06040	0.0488879	0.880699	-0.178882	0.285685	4	0.870612
AT1G06050	0.337868	0.534281	0.113797	0.812918	4	0.495314
AT1G06060	0.13589	0.800394	0.220356	0.502398	6	0.163841
AT1G06070	-0.0806534	0.868438	0.141884	0.619774	NA	NA
AT1G06080	-0.00193322	0.997867	0.0606808	0.892388	8	0.303833
AT1G06090	0.757594	0.438646	0.500223	0.540094	NA	NA
AT1G06100	-0.0159394	0.992037	-0.574754	0.500271	NA	NA
AT1G06110	0.128682	0.7515	0.342711	0.14936	NA	NA
AT1G06130	0.259256	0.367085	0.0668124	0.809159	NA	NA
AT1G06149	0.0061553	0.993361	-0.114888	0.775591	NA	NA
AT1G06150	0.115034	0.867573	0.0773567	0.868822	NA	NA
AT1G06180	0.118621	0.841478	-0.126645	0.747927	22	0.205253
AT1G06190	0.294296	0.164609	0.474424	0.00618305	12	0.165242
AT1G06200	-0.0214378	0.96428	-0.0588966	0.816885	NA	NA
AT1G06210	0.12369	0.753063	-0.0358603	0.911547	NA	NA
AT1G06220	-0.0262547	0.946904	0.126741	0.491507	NA	NA
AT1G06230	0.0757985	0.841544	-0.145853	0.515703	NA	NA
AT1G06240	-0.151645	0.799399	-0.602346	0.0761542	16	0.0571143
AT1G06270	0.0215883	0.983394	0.0872949	0.885018	NA	NA
AT1G06290	-0.0782739	0.797169	-0.0928968	0.641446	NA	NA
AT1G06360	-0.11063	0.678234	-0.0281849	0.900713	14	0.190391
AT1G06370	-0.0743584	0.965777	-0.677289	0.399157	NA	NA
AT1G06380	-0.158333	0.856662	0.069762	0.909256	14	0.223064
AT1G06390	-0.234124	0.538041	-0.232709	0.399146	NA	NA
AT1G06400	0.14904	0.726197	0.27561	0.290299	NA	NA
AT1G06410	0.192884	0.54363	-0.00877127	0.980307	NA	NA
AT1G06430	-0.401029	0.085868	-0.635672	0.00185365	17.4	0.234666
AT1G06450	-0.00395143	0.99642	0.00406833	0.995548	NA	NA
AT1G06460	0.503206	0.0885287	0.1617	0.561932	10	1.10931
AT1G06470	-0.0629114	0.932996	-0.175366	0.657287	10	0.297641
AT1G06475	-0.729099	0.596326	0.690726	0.414779	NA	NA
AT1G06490	-0.632826	0.450583	-0.932027	0.131613	NA	NA
AT1G06500	0.411715	0.735928	-0.0259495	0.984051	NA	NA
AT1G06510	-0.0902272	0.867573	-0.0322469	0.935505	NA	NA
AT1G06515	0.191462	0.750411	0.282083	0.464667	4	0.153376
AT1G06530	0.0780505	0.936022	-0.251642	0.625905	NA	NA
AT1G06550	-0.173692	0.6295	-0.497769	0.0354773	20	0.224161
AT1G06560	-0.0476493	0.939313	0.275156	0.330308	12	0.0939108
AT1G06570	-0.0168902	0.968459	-0.363156	0.0362921	0	0.715539
AT1G06580	0.274575	0.771573	-0.294684	0.665759	NA	NA
AT1G06590	-0.355367	0.498858	-0.121838	0.786987	NA	NA
AT1G06620	-0.515701	0.409986	-0.0512069	0.935556	NA	NA
AT1G06630	0.0118877	0.988996	-0.0358531	0.943812	NA	NA
AT1G06640	-0.1892	0.466026	-0.225294	0.229177	NA	NA
AT1G06645	-0.202783	0.685819	-0.608544	0.0547767	NA	NA
AT1G06650	0.17063	0.545567	0.126525	0.561564	NA	NA
AT1G06660	0.492482	0.590549	-0.062475	0.947165	NA	NA
AT1G06670	0.0309223	0.943805	-0.0223076	0.935358	NA	NA
AT1G06680	0.038245	0.911578	-0.525409	0.00230718	4	0.0277141
AT1G06690	-0.0254597	0.963991	-0.285546	0.23572	20	0.193723
AT1G06700	-0.146218	0.575302	0.128877	0.500271	NA	NA
AT1G06710	0.245009	0.794572	0.25156	0.687049	NA	NA
AT1G06720	0.0485207	0.936751	0.0574088	0.872214	NA	NA
AT1G06730	-0.091676	0.854632	0.25826	0.325216	16	0.303064
AT1G06740	-0.163484	0.828045	0.389257	0.332845	NA	NA
AT1G06760	-0.344228	0.106656	-0.47731	0.00787903	8	0.0991134
AT1G06770	-0.367494	0.629074	-0.126706	0.839806	NA	NA
AT1G06780	-0.180268	0.741469	0.0900436	0.825785	NA	NA
AT1G06790	0.0675713	0.947766	0.0508729	0.935695	NA	NA
AT1G06800	-0.159836	0.861917	-0.368116	0.482984	13	0.126003
AT1G06820	0.149868	0.598194	0.0942695	0.674769	NA	NA
AT1G06830	-1.05175	0.13768	-0.59085	0.296949	2	0.341111
AT1G06840	-0.2747	0.466419	-0.353967	0.193274	NA	NA
AT1G06850	0.507313	0.659284	-0.156551	0.879984	NA	NA
AT1G06870	0.200917	0.661351	0.00361942	0.995254	16	0.0588364
AT1G06890	-0.0214354	0.968742	0.0195011	0.953138	14	0.243211
AT1G06900	-0.43881	0.125521	-0.738307	0.00313104	NA	NA
AT1G06910	0.0476445	0.967326	-0.048572	0.943812	NA	NA
AT1G06950	0.219056	0.349154	0.585971	0.00178893	14	0.163946
AT1G06960	-0.0893251	0.908865	-0.818022	0.0378391	2	0.033631
AT1G06980	-0.39444	0.575491	-0.466604	0.352122	NA	NA
AT1G07000	-0.241147	0.80057	-0.046071	0.953122	NA	NA
AT1G07010	-0.248141	0.338361	-0.56564	0.00591016	22	0.669938
AT1G07020	-0.039499	0.968223	0.372334	0.365246	6	0.189674
AT1G07030	-0.0301021	0.959885	-0.140137	0.634095	12	0.218153
AT1G07040	0.438526	0.419323	-0.0787147	0.886684	10	0.360228
AT1G07070	0.0864963	0.881904	0.266081	0.383778	NA	NA
AT1G07080	-0.116749	0.767724	-0.146202	0.574154	15	0.102008
AT1G07090	-0.150624	0.887155	0.232837	0.705053	NA	NA
AT1G07110	0.113018	0.689758	0.0734152	0.733233	14	0.302115
AT1G07130	-0.183648	0.897676	0.053255	0.957924	NA	NA
AT1G07140	0.00525982	0.990355	-0.00586549	0.98443	NA	NA
AT1G07150	0.221084	0.833935	-0.206681	0.778852	NA	NA
AT1G07170	0.023679	0.975871	0.412997	0.193851	4	0.178898
AT1G07180	-0.53247	0.00736581	-0.828618	5.12158e-05	22	1.26499
AT1G07200	-0.411574	0.210371	-0.616989	0.0188355	NA	NA
AT1G07210	0.0444871	0.926808	0.190932	0.40637	NA	NA
AT1G07220	-0.50113	0.363154	-0.444274	0.294103	NA	NA
AT1G07230	-0.395266	0.11909	-0.405862	0.0486242	10	0.209614
AT1G07240	0.0422649	0.963357	0.0607013	0.908089	8	0.0517717
AT1G07250	0.0302465	0.957546	-0.122137	0.664545	12	0.120668
AT1G07260	-0.0703824	0.968742	0.228773	0.801432	NA	NA
AT1G07280	0.0767221	0.858261	0.0644852	0.81986	10	0.585071
AT1G07310	-0.337559	0.35786	-0.358087	0.199302	NA	NA
AT1G07320	0.0316993	0.927902	-0.0670229	0.729597	16	0.0538733
AT1G07350	-0.304054	0.430795	0.405946	0.126454	18	0.255746
AT1G07360	0.12713	0.694992	0.303688	0.124206	NA	NA
AT1G07370	0.199206	0.646735	0.465187	0.0839137	NA	NA
AT1G07380	0.1958	0.728375	0.067137	0.882949	5	0.152776
AT1G07390	-0.197953	0.780852	0.126839	0.799122	NA	NA
AT1G07400	-1.15073	0.263652	0.909873	0.158205	NA	NA
AT1G07410	-0.450112	0.708812	0.559346	0.432199	NA	NA
AT1G07420	0.332559	0.539455	0.55573	0.124956	12	0.3711
AT1G07430	0.0235165	0.987211	-0.965462	0.155436	16	0.362194
AT1G07440	0.110929	0.776052	-0.0738585	0.795004	NA	NA
AT1G07450	-0.848931	0.280141	-1.19934	0.0533079	0	0.708623
AT1G07470	0.14654	0.725067	0.0253857	0.944818	NA	NA
AT1G07480	0.155908	0.742605	0.115604	0.740162	NA	NA
AT1G07490	-0.185951	0.88148	-0.304228	0.688417	22	0.412038
AT1G07510	-0.00443117	0.995142	-0.0722774	0.870303	16	0.155645
AT1G07520	-0.23718	0.697464	-0.495818	0.201674	NA	NA
AT1G07530	-0.202242	0.463069	-0.218679	0.27784	14	0.135678
AT1G07560	-0.52548	0.579812	-0.142241	0.860569	NA	NA
AT1G07570	-0.00495221	0.992961	-0.0915716	0.763834	0	0.43051
AT1G07590	-0.191088	0.607253	0.0299441	0.931271	NA	NA
AT1G07600	-0.117781	0.941404	0.0781803	0.938672	NA	NA
AT1G07610	-0.164782	0.716083	0.283882	0.311364	NA	NA
AT1G07615	-0.478582	0.632704	0.287939	0.691744	NA	NA
AT1G07630	-0.250649	0.531215	0.0484308	0.893641	NA	NA
AT1G07640	0.0355307	0.961006	-0.0124845	0.979543	16	0.301551
AT1G07650	0.07192	0.901768	0.219363	0.468387	12	0.0681726
AT1G07660	0.00337909	0.996244	-0.354136	0.290618	NA	NA
AT1G07670	-0.016847	0.973478	-0.103903	0.685498	18	0.139269
AT1G07700	-0.0886596	0.796809	-0.427807	0.0273586	0	0.424421
AT1G07705	0.222619	0.683917	0.149818	0.71823	NA	NA
AT1G07720	-0.199798	0.340171	-0.0725078	0.703175	18	0.371735
AT1G07725	-0.077991	0.943805	-0.761348	0.138823	NA	NA
AT1G07728	0.386544	0.615394	-0.163577	0.807104	NA	NA
AT1G07740	-0.609662	0.49138	-0.669636	0.298263	NA	NA
AT1G07745	0.760554	0.337121	0.649657	0.301418	NA	NA
AT1G07750	-0.247513	0.367326	-0.022871	0.938066	NA	NA
AT1G07770	-0.200436	0.319767	0.250047	0.0987518	NA	NA
AT1G07780	-0.290031	0.478292	-0.432265	0.138423	NA	NA
AT1G07790	-0.224213	0.424523	0.0348003	0.898617	NA	NA
AT1G07810	0.0908563	0.814716	0.166576	0.467589	NA	NA
AT1G07820	0.151774	0.726411	0.137279	0.654441	NA	NA
AT1G07830	-0.010082	0.990598	0.0277525	0.960691	NA	NA
AT1G07840	-0.195521	0.706432	0.0804108	0.842539	NA	NA
AT1G07870	-0.354684	0.464111	0.0137189	0.980186	NA	NA
AT1G07880	0.150278	0.940088	-0.500184	0.658049	0	0.185706
AT1G07890	0.0545984	0.892801	0.498804	0.0126816	14	0.277241
AT1G07910	0.134934	0.741375	-0.000473515	0.998916	NA	NA
AT1G07920	-0.135403	0.540748	0.136732	0.391368	NA	NA
AT1G07930	-0.111771	0.650258	0.0973698	0.586311	NA	NA
AT1G07940	-0.111399	0.623243	0.154646	0.310209	NA	NA
AT1G07950	0.139407	0.817565	0.466727	0.146321	NA	NA
AT1G07960	-0.105077	0.859576	0.303557	0.325687	NA	NA
AT1G07970	-0.270353	0.496687	-0.293548	0.306969	NA	NA
AT1G07980	0.380613	0.616406	-0.171864	0.793189	NA	NA
AT1G07990	-0.325301	0.180086	-0.397506	0.0382636	12	0.0807648
AT1G08000	-0.423093	0.439473	-0.112489	0.819295	NA	NA
AT1G08010	0.115247	0.833599	0.227261	0.475815	14	0.13661
AT1G08030	0.342223	0.532263	0.195773	0.662067	NA	NA
AT1G08040	0.164774	0.677241	-0.473517	0.0633387	10	0.0599684
AT1G08050	-0.0579404	0.978745	-0.327353	0.781363	NA	NA
AT1G08060	0.189638	0.603288	-0.0360694	0.914301	NA	NA
AT1G08110	-0.0902183	0.771972	-0.0940017	0.657287	NA	NA
AT1G08115	-0.384965	0.46721	0.202177	0.645986	NA	NA
AT1G08125	0.117004	0.867573	0.229809	0.571308	NA	NA
AT1G08130	0.212014	0.493769	0.101883	0.696742	14	0.0988111
AT1G08160	-0.171428	0.862048	-0.738786	0.166879	NA	NA
AT1G08180	-0.646182	0.294769	-1.25673	0.0133708	NA	NA
AT1G08190	-0.133202	0.724134	-0.493561	0.0304612	NA	NA
AT1G08200	-0.328472	0.104122	-0.357107	0.0302287	NA	NA
AT1G08210	0.00586983	0.993507	0.146927	0.694454	NA	NA
AT1G08220	0.42288	0.58612	0.47922	0.378673	NA	NA
AT1G08230	-0.634847	0.197948	-0.783941	0.0455396	16	0.445747
AT1G08250	-0.507364	0.0458736	-0.657386	0.0031183	18	0.249536
AT1G08260	-0.0515814	0.927242	0.194754	0.477917	NA	NA
AT1G08270	-1.32691	0.304226	-0.0552987	0.964885	4	0.179298
AT1G08280	-0.348569	0.597724	-0.40466	0.383617	NA	NA
AT1G08290	-0.378046	0.769964	-0.467594	0.58824	13.7143	0.274308
AT1G08300	0.595385	0.400124	0.620439	0.242548	NA	NA
AT1G08315	-0.0807556	0.950273	0.00213094	0.997877	8	0.107998
AT1G08320	-0.822216	0.305583	-0.310706	0.655017	NA	NA
AT1G08340	-0.0554023	0.974681	-0.320476	0.725502	NA	NA
AT1G08350	0.0291472	0.97347	-0.312176	0.445259	NA	NA
AT1G08360	-0.0224151	0.950798	0.153807	0.33405	NA	NA
AT1G08370	-0.147987	0.727966	-0.0173582	0.962319	NA	NA
AT1G08380	0.386449	0.099844	-0.216577	0.273083	4	0.10241
AT1G08390	0.46417	0.360834	0.0656477	0.903027	2	0.253903
AT1G08400	0.0811158	0.922087	0.0386673	0.94413	NA	NA
AT1G08410	-0.000514631	0.998895	0.226633	0.387514	14	0.12865
AT1G08420	-0.155258	0.586129	-0.260977	0.173316	NA	NA
AT1G08430	-0.276039	0.810954	0.129517	0.874561	NA	NA
AT1G08450	-0.0786284	0.894624	0.163962	0.623739	NA	NA
AT1G08460	0.211088	0.631559	0.0849432	0.816112	8	0.130813
AT1G08465	-0.04621	0.93852	-0.252604	0.378023	NA	NA
AT1G08470	-0.384104	0.327402	-0.500383	0.0920345	12	0.110555
AT1G08480	-0.00996586	0.98176	0.20982	0.241796	2	0.0222221
AT1G08490	-0.256104	0.440524	-0.536978	0.0272175	16	0.105645
AT1G08500	0.22508	0.846501	0.276846	0.706768	NA	NA
AT1G08510	-0.330373	0.0977414	-0.289151	0.0735344	10	0.0132525
AT1G08520	0.17916	0.413128	-0.279814	0.0777123	NA	NA
AT1G08530	-0.12753	0.877265	-0.20793	0.678049	NA	NA
AT1G08540	0.386863	0.111995	0.140914	0.531225	14	0.117013
AT1G08550	0.892227	0.00641469	0.283024	0.313082	12	0.620722
AT1G08560	0.296754	0.407682	0.174331	0.562156	12	0.0517423
AT1G08570	-0.379176	0.104122	-0.481402	0.0129409	18	0.429482
AT1G08580	0.169925	0.803459	0.423313	0.267098	NA	NA
AT1G08590	-0.104252	0.910725	-0.0747177	0.900765	NA	NA
AT1G08592	-0.501994	0.680759	-0.0595782	0.955819	NA	NA
AT1G08600	0.312622	0.578124	0.133482	0.780476	NA	NA
AT1G08610	0.436803	0.283928	0.475164	0.12809	10	0.0194907
AT1G08620	-0.0890292	0.816288	-0.270846	0.202529	NA	NA
AT1G08640	0.0681216	0.862306	0.221065	0.283064	16	0.0444145
AT1G08650	0.0131248	0.982209	0.250571	0.328608	NA	NA
AT1G08660	-0.159171	0.749147	0.00512577	0.992578	10	0.12875
AT1G08680	-0.302515	0.357651	-0.0569462	0.859292	NA	NA
AT1G08700	-0.433931	0.105694	-0.267483	0.227482	NA	NA
AT1G08710	0.26775	0.736855	0.0438667	0.951736	NA	NA
AT1G08720	0.0814884	0.855486	0.176332	0.484046	NA	NA
AT1G08750	-0.0231027	0.975871	-0.100086	0.804814	NA	NA
AT1G08760	-0.218897	0.549645	-0.284038	0.264965	NA	NA
AT1G08770	-0.166736	0.750122	-0.0516874	0.901357	NA	NA
AT1G08780	0.337895	0.429901	0.453197	0.141294	3	0.0639529
AT1G08800	-0.325222	0.286664	-0.234782	0.336879	NA	NA
AT1G08810	0.002776	0.997499	-0.881081	0.0293879	NA	NA
AT1G08820	-0.0268556	0.968138	0.207499	0.479774	NA	NA
AT1G08830	0.452437	0.0758958	0.760012	0.000793154	NA	NA
AT1G08840	-0.303094	0.622175	-0.509409	0.218837	NA	NA
AT1G08845	-0.257585	0.757598	-0.0164706	0.984051	NA	NA
AT1G08880	-0.186089	0.633394	0.061311	0.851449	NA	NA
AT1G08890	0.449903	0.574509	0.168531	0.810643	10	1.00363
AT1G08900	0.542412	0.214922	-0.0938591	0.840572	8	0.135225
AT1G08910	0.151843	0.800828	0.293573	0.406788	NA	NA
AT1G08920	0.365836	0.429669	0.0349408	0.94413	NA	NA
AT1G08930	-0.208959	0.637378	0.166979	0.604642	6	0.440533
AT1G08960	-0.045203	0.968138	0.000469338	0.999252	NA	NA
AT1G08970	0.295122	0.392399	0.11196	0.720731	NA	NA
AT1G08980	0.298293	0.468253	0.395652	0.173712	12	0.387582
AT1G08990	-0.0462747	0.972277	-0.0293285	0.971194	2	0.12965
AT1G09000	-0.0831427	0.958333	-0.506941	0.507757	NA	NA
AT1G09010	0.072776	0.832619	0.0890471	0.6862	10	0.142427
AT1G09020	-0.0132745	0.976554	-0.0440183	0.860021	NA	NA
AT1G09040	-0.258799	0.753063	-0.0353443	0.959924	NA	NA
AT1G09050	0.403345	0.517161	0.113315	0.842539	NA	NA
AT1G09060	-0.128683	0.684482	-0.119059	0.598781	NA	NA
AT1G09070	-0.21983	0.517987	0.0562821	0.853617	NA	NA
AT1G09090	-0.401127	0.796809	0.408284	0.667226	NA	NA
AT1G09100	-0.418545	0.316718	-0.711655	0.0282001	NA	NA
AT1G09130	0.10222	0.741255	0.0675228	0.768537	NA	NA
AT1G09140	0.071931	0.854746	-0.0232775	0.93739	16	0.119346
AT1G09150	0.230376	0.643642	0.0252475	0.957924	NA	NA
AT1G09160	0.077774	0.841501	0.174966	0.424232	NA	NA
AT1G09180	-0.119802	0.94065	-1.29479	0.104564	0	0.444313
AT1G09190	0.381297	0.776052	-0.221893	0.834458	NA	NA
AT1G09195	-0.743019	0.416658	-0.216107	0.785931	NA	NA
AT1G09200	-0.0814381	0.823665	0.037591	0.886684	9.6	0.169125
AT1G09210	0.104173	0.697638	0.302076	0.0615395	6	0.0799575
AT1G09230	0.516922	0.497118	0.717846	0.170844	NA	NA
AT1G09240	1.06465	0.190762	1.4696	0.0185235	NA	NA
AT1G09250	-0.115658	0.789088	0.110557	0.700862	2	0.154831
AT1G09270	-0.106432	0.737057	0.136317	0.51246	NA	NA
AT1G09280	-0.0694175	0.90971	-0.0555535	0.887022	12	0.117624
AT1G09290	-0.187147	0.733699	0.40081	0.207735	NA	NA
AT1G09300	0.0541459	0.951866	0.421163	0.260557	NA	NA
AT1G09310	-0.281935	0.321811	-0.474418	0.0275202	NA	NA
AT1G09320	0.0111792	0.991473	-0.392214	0.458333	NA	NA
AT1G09330	-0.306454	0.249085	0.0954341	0.695355	NA	NA
AT1G09340	-0.206844	0.360618	-0.697245	0.000324427	20	0.132529
AT1G09350	0.0721199	0.97054	0.223917	0.825785	NA	NA
AT1G09390	0.150485	0.734428	-0.134393	0.677702	4	0.564806
AT1G09415	0.865357	0.0916391	0.40025	0.390813	NA	NA
AT1G09420	0.290282	0.637378	0.746545	0.0490527	NA	NA
AT1G09430	-0.128839	0.591024	0.110526	0.531765	8	0.418399
AT1G09440	-0.09297	0.88517	-0.281541	0.419692	NA	NA
AT1G09450	0.393337	0.704311	-0.788347	0.281181	NA	NA
AT1G09470	0.0349815	0.979823	0.218682	0.753384	NA	NA
AT1G09490	0.205394	0.471536	0.0395585	0.883913	NA	NA
AT1G09500	0.209387	0.844661	-0.749402	0.230082	15.4286	0.553996
AT1G09520	0.131071	0.800144	0.183554	0.574778	NA	NA
AT1G09530	0.238063	0.582159	0.00110695	0.997877	NA	NA
AT1G09560	-0.427145	0.543455	-0.724253	0.136582	NA	NA
AT1G09570	0.162802	0.566351	0.37488	0.0459758	8	0.304218
AT1G09575	-0.232195	0.832569	-0.450927	0.494955	6	0.247773
AT1G09580	0.038089	0.968742	-0.131061	0.79634	NA	NA
AT1G09590	0.162081	0.549645	0.0967732	0.655671	NA	NA
AT1G09620	0.0178161	0.959813	0.307098	0.0334766	16	0.000787148
AT1G09630	0.0514245	0.948279	0.317147	0.360944	NA	NA
AT1G09640	-0.149296	0.533096	0.100106	0.593061	12	0.04822
AT1G09645	-0.115547	0.843422	0.339661	0.265618	NA	NA
AT1G09660	0.137114	0.746246	0.323123	0.196209	12	0.17343
AT1G09690	0.0855018	0.755598	0.0768288	0.691414	NA	NA
AT1G09700	0.315846	0.517267	0.225235	0.556613	NA	NA
AT1G09710	0.122192	0.884051	-0.0727942	0.899441	NA	NA
AT1G09730	0.0436659	0.917447	-0.00519149	0.988937	NA	NA
AT1G09740	-0.0912957	0.892606	0.127372	0.753268	NA	NA
AT1G09750	0.418716	0.409381	0.566016	0.121561	10	0.268352
AT1G09760	0.154008	0.62013	0.260797	0.200288	NA	NA
AT1G09770	0.256969	0.283035	0.163316	0.407997	12	0.111115
AT1G09780	-0.0762701	0.837997	0.0524738	0.837321	16	0.14956
AT1G09795	0.0830335	0.86314	-0.127137	0.667768	16	0.330784
AT1G09800	0.237054	0.813305	0.667417	0.214984	NA	NA
AT1G09810	0.217072	0.731369	0.460645	0.224224	NA	NA
AT1G09815	-0.0535656	0.925084	0.290644	0.25629	NA	NA
AT1G09820	-0.0168338	0.983658	-0.228056	0.593075	NA	NA
AT1G09830	-0.0323332	0.948354	-0.0390965	0.890694	16	0.128109
AT1G09840	-0.0604483	0.898106	-0.181027	0.474799	NA	NA
AT1G09850	-0.210547	0.55531	0.25628	0.287943	14	0.328461
AT1G09870	-0.235644	0.563835	-0.0507702	0.888871	NA	NA
AT1G09890	-0.678499	0.635961	-0.306476	0.782422	NA	NA
AT1G09900	0.431289	0.171394	0.582126	0.0196126	12	0.240056
AT1G09910	-0.0745734	0.935756	-0.264812	0.57437	10	0.0141035
AT1G09920	0.192288	0.622283	0.19375	0.48772	4	0.188298
AT1G09932	0.332983	0.801715	0.0864387	0.936816	2	0.0946742
AT1G09940	0.244759	0.584414	0.549928	0.0555471	12	0.129306
AT1G09960	0.242151	0.823513	0.537841	0.37555	NA	NA
AT1G09970	-0.0713077	0.863576	0.0491651	0.860569	NA	NA
AT1G09980	0.159319	0.610576	-0.00842713	0.980307	NA	NA
AT1G09995	0.278522	0.894942	0.373993	0.769406	NA	NA
AT1G10020	-0.210855	0.736218	-0.164228	0.717421	18.8571	0.231862
AT1G10030	0.0502942	0.952205	0.030208	0.953818	2	0.0682744
AT1G10040	-0.0116479	0.995933	0.282522	0.812859	NA	NA
AT1G10050	-0.420815	0.397665	-0.131398	0.768537	NA	NA
AT1G10060	0.686745	0.21029	0.272329	0.593506	9	0.383743
AT1G10070	-0.136723	0.942636	0.457275	0.615799	NA	NA
AT1G10090	0.331106	0.283035	0.382289	0.104179	12	0.241951
AT1G10095	0.718416	0.357361	0.229346	0.762812	NA	NA
AT1G10120	-0.170794	0.749113	-0.424688	0.189604	NA	NA
AT1G10130	0.0931093	0.836176	-0.148071	0.596302	14	0
AT1G10140	0.175984	0.884858	-0.239114	0.760448	8	0.284197
AT1G10150	-0.209179	0.528397	-0.379267	0.0959615	NA	NA
AT1G10160	-0.267995	0.707269	-0.385825	0.417298	NA	NA
AT1G10170	-0.186995	0.472025	-0.0245335	0.924248	5.14286	0.0586005
AT1G10180	0.12712	0.77421	0.017796	0.961854	NA	NA
AT1G10200	0.135294	0.716542	0.199552	0.405785	10	0.227437
AT1G10210	-0.383061	0.518157	-0.299925	0.506821	NA	NA
AT1G10230	0.0355973	0.96828	0.529887	0.127443	NA	NA
AT1G10240	-0.00337	0.996405	0.407861	0.201955	NA	NA
AT1G10270	0.0912325	0.884858	0.500222	0.0975969	3.42857	0.0364978
AT1G10280	-0.157701	0.821797	-0.0840387	0.866127	NA	NA
AT1G10290	-0.0265013	0.948939	0.0356181	0.877786	NA	NA
AT1G10310	0.642707	0.0889078	0.105894	0.794671	NA	NA
AT1G10320	-0.328073	0.800828	-0.958914	0.224337	NA	NA
AT1G10330	-0.157665	0.912219	-0.32137	0.697729	NA	NA
AT1G10340	-0.0373296	0.985592	0.748427	0.390397	NA	NA
AT1G10350	0.1419	0.823897	-0.0898425	0.84472	NA	NA
AT1G10360	0.354738	0.121556	-0.268589	0.167124	0	0.231342
AT1G10370	-0.508365	0.0317799	-0.631425	0.00231723	22	1.05217
AT1G10380	-0.14582	0.820168	0.028965	0.954532	NA	NA
AT1G10390	0.0548629	0.888045	-0.0191534	0.946541	NA	NA
AT1G10410	0.177782	0.649174	0.253797	0.324331	NA	NA
AT1G10430	-0.201463	0.4992	-0.195928	0.373083	NA	NA
AT1G10450	0.176939	0.635961	0.273502	0.264965	NA	NA
AT1G10470	-0.201589	0.473882	-0.600194	0.00442513	NA	NA
AT1G10480	0.289925	0.903506	0.885217	0.454039	4	0.0616388
AT1G10490	-0.0932767	0.852981	-0.27311	0.316258	16	0.159747
AT1G10500	0.0164919	0.975942	-0.467772	0.0435598	2	0.147233
AT1G10510	0.250987	0.286706	0.301134	0.0938414	NA	NA
AT1G10520	-1.10587	0.24398	-0.649302	0.385069	NA	NA
AT1G10522	-0.0869588	0.779796	0.69064	0.000480502	NA	NA
AT1G10560	-0.89776	0.457383	0.0834947	0.940931	NA	NA
AT1G10570	0.265218	0.689342	-0.0332687	0.957319	NA	NA
AT1G10580	0.232879	0.687959	-0.267767	0.521697	12	0.144139
AT1G10590	0.0235425	0.957094	0.0595647	0.794671	NA	NA
AT1G10600	0.420283	0.332955	0.41763	0.211292	NA	NA
AT1G10610	0.372183	0.686689	0.145911	0.848344	NA	NA
AT1G10630	-0.0821806	0.796803	-0.103848	0.614395	NA	NA
AT1G10640	0.010136	0.982678	-0.568571	0.00710314	22	0.297554
AT1G10650	-0.174118	0.654826	-0.623051	0.0149165	20	0.367838
AT1G10657	-0.15543	0.879233	-1.65041	0.00691607	20	0.412271
AT1G10660	0.196793	0.594726	0.25896	0.303813	16	0.0639526
AT1G10670	-0.142189	0.508504	-0.136104	0.38825	NA	NA
AT1G10682	-0.310064	0.531217	-0.0653494	0.883774	6	0.0856991
AT1G10690	0.370829	0.779599	0.498181	0.557431	NA	NA
AT1G10700	-0.0867522	0.855997	0.0505396	0.876816	NA	NA
AT1G10720	-0.350799	0.335636	-0.281684	0.325033	NA	NA
AT1G10730	-0.282877	0.749147	-0.821169	0.133454	NA	NA
AT1G10740	-0.219093	0.517132	-0.287876	0.225543	17.1429	0.361224
AT1G10750	-0.30927	0.729161	0.163155	0.801432	NA	NA
AT1G10760	0.882819	0.000533105	0.478418	0.00903907	12	0.742981
AT1G10780	0.260648	0.750396	0.907119	0.0471747	NA	NA
AT1G10820	-0.00813275	0.990568	-0.569028	0.069132	NA	NA
AT1G10830	-0.172212	0.694476	-0.25068	0.385282	NA	NA
AT1G10840	0.123725	0.598194	0.339165	0.0271653	NA	NA
AT1G10850	0.069715	0.855759	-0.0927844	0.700197	NA	NA
AT1G10865	-0.152519	0.818036	-0.0130404	0.982666	NA	NA
AT1G10870	0.233641	0.528397	-0.0111921	0.9786	NA	NA
AT1G10890	0.606914	0.205306	0.773336	0.0366416	NA	NA
AT1G10900	0.301906	0.207774	-0.201213	0.313082	NA	NA
AT1G10910	0.369813	0.263288	0.0690603	0.838126	NA	NA
AT1G10920	0.28867	0.684228	-0.0483318	0.94184	NA	NA
AT1G10930	0.246658	0.540761	0.250607	0.389465	NA	NA
AT1G10940	0.276786	0.315255	-0.164266	0.484988	NA	NA
AT1G10950	-0.259889	0.204449	-0.114214	0.524167	12	0.071159
AT1G10960	-0.411298	0.085868	-0.229006	0.249246	18	0.354191
AT1G10970	0.279069	0.863913	0.819193	0.317493	NA	NA
AT1G11000	-0.467573	0.598984	-0.134061	0.859292	NA	NA
AT1G11020	0.118794	0.856425	0.352358	0.307182	17.1429	0.0564215
AT1G11050	-0.155539	0.837997	-0.00213225	0.997414	NA	NA
AT1G11060	-0.162914	0.650941	0.0873659	0.753702	NA	NA
AT1G11080	-0.130243	0.936043	-0.634914	0.430551	8	0.251055
AT1G11090	-0.10833	0.852981	-0.384254	0.220111	NA	NA
AT1G11100	-1.11826	0.248829	-0.904759	0.22766	NA	NA
AT1G11130	-0.351309	0.324279	-0.0251942	0.948913	16	0.0860647
AT1G11150	0.566652	0.527282	-0.209114	0.801432	NA	NA
AT1G11160	0.067814	0.970291	-0.0176687	0.990791	NA	NA
AT1G11175	0.339204	0.650893	0.357445	0.495912	NA	NA
AT1G11180	0.943384	0.118811	0.959379	0.0493395	8	0.187146
AT1G11190	-0.239664	0.817222	-0.246425	0.720062	NA	NA
AT1G11200	-0.379442	0.582774	0.237845	0.644125	NA	NA
AT1G11210	0.3366	0.852981	0.806843	0.397607	10	1.56675
AT1G11220	-0.285235	0.85442	0.31195	0.738961	NA	NA
AT1G11240	0.458805	0.21906	0.186839	0.584049	NA	NA
AT1G11260	0.126955	0.62879	-0.352274	0.0395693	8	0.255308
AT1G11270	0.336849	0.731836	0.280369	0.693499	NA	NA
AT1G11280	-0.183077	0.556534	-0.321128	0.129385	NA	NA
AT1G11290	0.21215	0.755141	0.443841	0.271338	14	0.107647
AT1G11300	0.165147	0.820922	0.338762	0.419692	NA	NA
AT1G11310	-0.0941073	0.804926	0.181641	0.416052	12	0.328936
AT1G11320	0.225994	0.819965	0.504058	0.363493	NA	NA
AT1G11330	-0.132002	0.872484	-0.0461247	0.9392	NA	NA
AT1G11340	-0.109634	0.937709	-0.178864	0.82312	NA	NA
AT1G11350	-0.0715271	0.915912	-0.0210974	0.964168	12	0.125384
AT1G11360	0.166756	0.726197	-0.246639	0.436808	6	0.0452867
AT1G11380	-0.0636915	0.964571	-0.224714	0.766143	4	0.12096
AT1G11390	-0.0724299	0.903506	-0.0547501	0.886684	NA	NA
AT1G11400	-0.128506	0.824986	0.0866902	0.827208	NA	NA
AT1G11410	-0.131388	0.690077	-0.294688	0.153819	NA	NA
AT1G11420	-0.564719	0.581084	-1.04306	0.149291	NA	NA
AT1G11430	0.292117	0.156978	0.161138	0.355083	NA	NA
AT1G11440	-0.00717754	0.991069	-0.162533	0.634441	NA	NA
AT1G11450	-0.130494	0.897897	0.154444	0.80058	NA	NA
AT1G11475	-0.0180453	0.978745	-0.130435	0.700699	NA	NA
AT1G11480	0.172617	0.566382	-0.051327	0.848093	10	0.0969581
AT1G11530	0.213612	0.606402	0.28899	0.302021	NA	NA
AT1G11540	0.114855	0.962174	-0.771812	0.533479	NA	NA
AT1G11545	0.0727838	0.901036	0.434255	0.112083	8	0.256775
AT1G11580	-0.391517	0.248829	-0.262935	0.339357	NA	NA
AT1G11592	0.894372	0.245544	0.436017	0.535145	NA	NA
AT1G11600	0.0685798	0.888606	0.519127	0.0277465	NA	NA
AT1G11630	0.219369	0.810888	0.357188	0.518671	8	0.156222
AT1G11650	-0.0683086	0.814231	0.0254371	0.906708	NA	NA
AT1G11660	0.256125	0.265455	0.373001	0.0342084	12	0.131247
AT1G11670	-0.230658	0.567749	0.0021143	0.996258	NA	NA
AT1G11680	-0.183461	0.482731	0.0859166	0.694273	NA	NA
AT1G11700	-0.0745119	0.852981	-0.0867641	0.733859	22	0.380828
AT1G11710	0.176345	0.88517	-0.202831	0.799884	NA	NA
AT1G11720	0.117886	0.803902	-0.30857	0.262991	NA	NA
AT1G11750	0.179767	0.562836	-0.0692552	0.793782	20	0
AT1G11755	0.043585	0.959143	0.337574	0.353684	NA	NA
AT1G11760	-0.101769	0.926875	-0.120856	0.854315	NA	NA
AT1G11780	-0.206801	0.736546	0.337949	0.361863	NA	NA
AT1G11790	-0.117593	0.820016	-0.183541	0.567538	18	0.175212
AT1G11800	-0.221831	0.691396	-0.06933	0.878822	NA	NA
AT1G11820	-0.187798	0.512352	-0.120406	0.593568	NA	NA
AT1G11840	0.0757497	0.805052	-0.168449	0.34448	22	0.175878
AT1G11860	-0.142347	0.487788	-0.4671	0.0021918	16	0.137056
AT1G11870	0.082296	0.874258	0.0557981	0.873083	NA	NA
AT1G11880	-0.398203	0.520664	-0.3907	0.387923	NA	NA
AT1G11890	-0.248453	0.472243	-0.318938	0.198499	2	0.0838255
AT1G11900	-0.481107	0.640044	-0.532107	0.463535	NA	NA
AT1G11905	-0.0775787	0.917822	0.129627	0.763579	NA	NA
AT1G11910	0.0226286	0.949454	0.0572452	0.758163	NA	NA
AT1G11930	0.474142	0.497118	0.0535516	0.94184	NA	NA
AT1G11940	0.144314	0.940088	0.183641	0.871411	NA	NA
AT1G11950	0.0503079	0.971875	-0.189515	0.803762	16	0.137628
AT1G11960	-0.828606	0.114495	-0.824025	0.0526563	14	0.152825
AT1G12000	-0.0386141	0.903878	-0.0259764	0.901357	NA	NA
AT1G12010	-0.393864	0.699251	-0.458245	0.511954	NA	NA
AT1G12013	0.0908333	0.943929	0.758914	0.16068	NA	NA
AT1G12020	-0.055244	0.937918	0.231393	0.496687	NA	NA
AT1G12050	0.453713	0.0696635	0.323661	0.115139	NA	NA
AT1G12060	-0.513851	0.528651	-0.22448	0.738638	NA	NA
AT1G12080	-0.855066	0.212372	-0.0771519	0.911547	NA	NA
AT1G12090	0.577047	0.0194052	0.326035	0.107365	10	0.244344
AT1G12110	-0.216912	0.401791	0.204667	0.289543	NA	NA
AT1G12120	0.309768	0.283035	0.337872	0.125916	10	0.283022
AT1G12140	-0.170206	0.597724	-0.23382	0.288344	13.7143	0.193389
AT1G12160	0.314891	0.853073	1.17546	0.152229	NA	NA
AT1G12200	-0.732082	0.176522	-0.0224926	0.969968	20	0.164713
AT1G12210	0.260374	0.881292	0.259739	0.816112	NA	NA
AT1G12220	0.126039	0.832974	0.193825	0.593913	NA	NA
AT1G12230	-0.000442752	0.998895	-0.414401	0.053384	NA	NA
AT1G12240	0.0602716	0.83581	-0.149087	0.36192	NA	NA
AT1G12244	0.211531	0.700489	0.117896	0.781952	15.4286	0.304368
AT1G12250	0.0289082	0.960233	-0.513711	0.0367766	4	0.0399741
AT1G12260	-0.451419	0.701699	-0.494973	0.544736	NA	NA
AT1G12270	0.15801	0.636619	0.24116	0.271825	12	0.197742
AT1G12280	-0.40478	0.327402	-0.500434	0.112613	18	0.275132
AT1G12290	0.364703	0.558907	-0.00893609	0.991308	NA	NA
AT1G12300	0.502312	0.537251	0.723299	0.190423	NA	NA
AT1G12310	-0.0928636	0.764497	0.0413141	0.860604	NA	NA
AT1G12320	0.00651284	0.995218	-0.430955	0.462778	2	0
AT1G12330	-0.0251229	0.970449	0.134892	0.682908	16	0.071895
AT1G12340	-0.456523	0.723943	-0.354634	0.701316	NA	NA
AT1G12350	0.0797324	0.903722	0.138615	0.719704	2	0.264442
AT1G12360	-0.114352	0.739784	-0.107946	0.655266	10	0.167953
AT1G12370	-0.344596	0.619163	-0.294759	0.565023	22	0.36403
AT1G12380	-0.623705	0.250113	-0.257347	0.584489	20	0.176012
AT1G12390	-0.0402582	0.966471	0.0724125	0.889091	NA	NA
AT1G12400	-0.447236	0.566532	-0.338148	0.567615	NA	NA
AT1G12410	0.110048	0.678167	0.0305361	0.890694	NA	NA
AT1G12420	0.0427631	0.975871	-0.29584	0.683683	NA	NA
AT1G12430	-0.102108	0.823213	-0.044502	0.893262	18	0.174954
AT1G12440	-0.257314	0.290854	-0.0595287	0.800388	4	0.131521
AT1G12450	-0.0669389	0.945336	-0.0495825	0.934491	6	0.156854
AT1G12460	-0.326313	0.373163	-0.148219	0.64044	NA	NA
AT1G12470	0.0348557	0.941665	-0.056953	0.834724	NA	NA
AT1G12480	0.243103	0.848591	0.212693	0.800954	NA	NA
AT1G12500	-0.0390357	0.935693	-0.0723178	0.785311	NA	NA
AT1G12520	0.43479	0.397144	-0.0406623	0.943386	20.5714	0.138558
AT1G12530	0.319823	0.600119	0.126494	0.808092	1	0.15452
AT1G12550	-0.934692	0.154681	-1.1623	0.0307677	20	0.160499
AT1G12560	0.114976	0.955729	0.879506	0.286488	NA	NA
AT1G12570	-0.634368	0.372499	-0.342573	0.560722	NA	NA
AT1G12580	-0.020741	0.967284	-0.16634	0.454525	NA	NA
AT1G12620	0.230733	0.744323	0.334179	0.461223	NA	NA
AT1G12640	-0.152222	0.637378	-0.101968	0.681474	NA	NA
AT1G12650	0.0142955	0.980634	-0.11081	0.713922	NA	NA
AT1G12680	0.211093	0.553772	0.14125	0.617559	NA	NA
AT1G12700	0.455896	0.591375	-0.121918	0.87699	NA	NA
AT1G12710	0.147584	0.857152	-0.115854	0.836803	10	0.240893
AT1G12730	0.0931842	0.940088	-0.16025	0.822777	10	0.446913
AT1G12740	-0.251805	0.77678	-0.0476033	0.948546	NA	NA
AT1G12750	0.00773085	0.993766	-0.625949	0.161364	13.7143	0.215323
AT1G12760	-0.237902	0.318981	-0.238203	0.193728	NA	NA
AT1G12770	0.408904	0.0941722	0.432047	0.0306818	13	0.28604
AT1G12775	0.691367	0.211292	0.466532	0.309045	NA	NA
AT1G12780	0.29317	0.467814	0.130576	0.70913	8	0.553772
AT1G12790	0.807128	0.428761	0.404768	0.655161	8	0.242695
AT1G12800	0.19278	0.388473	-0.30532	0.0621949	NA	NA
AT1G12810	0.122075	0.878787	-0.0138561	0.984051	NA	NA
AT1G12820	-0.0725038	0.796809	-0.235771	0.132817	NA	NA
AT1G12830	0.225196	0.750396	-0.0496762	0.936008	NA	NA
AT1G12840	-0.149418	0.532559	0.00758445	0.976185	NA	NA
AT1G12845	0.472165	0.522111	0.420962	0.444433	10	0.763368
AT1G12850	0.0797446	0.849842	-0.0332406	0.912806	10	0.00705606
AT1G12860	0.530863	0.0128556	0.395037	0.0234006	NA	NA
AT1G12880	-0.160325	0.908747	-0.225318	0.788546	4	0.163038
AT1G12900	0.0747722	0.785853	-0.373132	0.016473	22	0.0954786
AT1G12910	-0.06305	0.915232	-0.0423215	0.912098	6	0.0794327
AT1G12920	0.0807005	0.835503	0.0506326	0.852366	NA	NA
AT1G12930	-0.0388167	0.94693	-0.101003	0.743223	NA	NA
AT1G12970	-0.0711034	0.927636	-0.04275	0.932708	NA	NA
AT1G12990	-0.106068	0.784317	0.139857	0.570095	10	0.122639
AT1G13000	0.535076	0.164562	0.225469	0.520524	10	0.317927
AT1G13020	0.0462404	0.965777	-0.221894	0.682263	NA	NA
AT1G13030	0.731785	0.164652	0.674969	0.107362	16	0.0553225
AT1G13060	0.018379	0.968742	0.101864	0.654706	NA	NA
AT1G13080	0.0984349	0.724372	0.00394319	0.990763	0	0.807268
AT1G13090	0.221137	0.401397	0.208679	0.295935	12	0.12549
AT1G13100	-0.422069	0.425427	-0.357202	0.378798	6	0.104975
AT1G13110	0.0554296	0.905475	0.00933534	0.979543	8	0.329717
AT1G13120	0.18809	0.71407	0.173583	0.636316	NA	NA
AT1G13145	0.0247381	0.988232	0.171352	0.849776	NA	NA
AT1G13160	-0.01241	0.982807	0.0468789	0.888228	NA	NA
AT1G13170	-0.190438	0.653747	-0.135662	0.671347	NA	NA
AT1G13180	-0.195615	0.823213	-0.296998	0.588151	NA	NA
AT1G13190	0.220425	0.497757	0.172014	0.493115	NA	NA
AT1G13195	-0.272831	0.664813	-0.0513825	0.925855	NA	NA
AT1G13210	-0.095302	0.887155	0.379243	0.248485	9	0.279958
AT1G13220	0.758851	0.0885287	0.155057	0.742777	NA	NA
AT1G13245	0.406089	0.343011	0.127524	0.752049	NA	NA
AT1G13250	0.122615	0.824118	0.0271956	0.951599	16	0.113268
AT1G13260	0.54998	0.584907	0.904296	0.168766	6	0.829959
AT1G13270	-0.130948	0.800828	0.915619	0.00159391	14	0.418857
AT1G13280	-0.0102933	0.988276	-0.173548	0.607934	NA	NA
AT1G13300	0.10494	0.925764	0.478073	0.355508	4	0.11817
AT1G13320	-0.261699	0.489993	-0.239271	0.395566	NA	NA
AT1G13340	0.242297	0.850195	0.341896	0.664975	NA	NA
AT1G13350	0.703999	0.239763	0.0301913	0.967054	NA	NA
AT1G13360	0.253235	0.426203	0.602453	0.00975225	NA	NA
AT1G13380	-0.0787148	0.915969	-0.115969	0.793657	14	0.0903826
AT1G13390	0.346835	0.619019	0.160129	0.782458	NA	NA
AT1G13410	-1.17425	0.287498	0.134938	0.892055	NA	NA
AT1G13440	-0.262633	0.153467	-0.269705	0.0632305	20	0.140231
AT1G13448	0.63391	0.610074	0.704663	0.419439	2	0.0816115
AT1G13450	-0.169423	0.728531	-0.210893	0.518986	6	0.0315279
AT1G13460	-0.263464	0.519675	-0.453398	0.111632	NA	NA
AT1G13560	0.0335423	0.939313	0.0940515	0.687049	16	0.195425
AT1G13570	0.389127	0.392818	0.031646	0.950766	NA	NA
AT1G13580	-0.122053	0.867573	-0.348417	0.388845	NA	NA
AT1G13590	0.316346	0.798463	0.433495	0.57933	3	0.258196
AT1G13609	-0.760293	0.302862	-4.96008	3.85528e-05	NA	NA
AT1G13630	-0.090126	0.964629	-0.606871	0.548644	NA	NA
AT1G13640	-0.217394	0.493224	0.275221	0.207106	14	0.559006
AT1G13650	0.761383	0.00415131	-0.492602	0.0205679	0	1.17982
AT1G13670	0.295147	0.799475	0.165098	0.847176	NA	NA
AT1G13690	0.135385	0.745542	0.34969	0.151257	NA	NA
AT1G13700	0.429113	0.591496	0.501457	0.369399	6	0.651204
AT1G13710	0.775722	0.322395	0.249171	0.747262	NA	NA
AT1G13730	-0.0693062	0.90724	0.0964948	0.785107	16	0.0735351
AT1G13740	-0.135901	0.913749	-0.494981	0.457295	NA	NA
AT1G13750	-0.327486	0.779599	-0.114748	0.897399	NA	NA
AT1G13770	-0.166419	0.847767	0.0271618	0.966986	NA	NA
AT1G13780	0.450914	0.442095	0.370767	0.415678	NA	NA
AT1G13790	0.693281	0.381406	0.611644	0.320332	NA	NA
AT1G13800	-0.148486	0.944144	-0.027227	0.98723	NA	NA
AT1G13810	0.0778766	0.920699	-0.0814564	0.865356	NA	NA
AT1G13820	-0.241289	0.337492	-0.580792	0.00421771	2	0.120089
AT1G13860	0.130826	0.825314	0.35741	0.268861	NA	NA
AT1G13870	0.237311	0.572126	0.354849	0.211276	NA	NA
AT1G13880	-0.0595174	0.923462	-0.0484595	0.898617	NA	NA
AT1G13900	-0.150572	0.607951	-0.14951	0.478621	NA	NA
AT1G13910	-0.43433	0.674076	-0.0515396	0.955568	NA	NA
AT1G13920	0.393296	0.753218	-0.137398	0.895445	NA	NA
AT1G13930	1.01774	0.000519827	0.920223	0.000120277	10	0.50391
AT1G13940	0.228067	0.501682	0.176452	0.500501	NA	NA
AT1G13950	-0.53429	0.655913	0.14923	0.874561	NA	NA
AT1G13960	0.0486988	0.948002	-0.030251	0.948966	NA	NA
AT1G13970	-0.110957	0.938545	0.0163598	0.989139	NA	NA
AT1G13980	-0.111868	0.722435	-0.204139	0.295002	12	0.117195
AT1G13990	0.0367387	0.968423	0.138065	0.767168	7	0.542163
AT1G14000	-0.128981	0.626187	-0.14055	0.449762	NA	NA
AT1G14010	0.150371	0.817565	-0.0557189	0.911247	4	0.146383
AT1G14020	-0.200739	0.617317	-0.0288605	0.939212	16	0.0642513
AT1G14030	0.432822	0.118464	0.40038	0.0733416	NA	NA
AT1G14040	-0.323285	0.732727	-0.0564399	0.94413	NA	NA
AT1G14060	0.00973695	0.990568	0.648426	0.0496699	NA	NA
AT1G14070	0.246289	0.801798	0.194264	0.775874	NA	NA
AT1G14080	-0.485214	0.730944	0.272157	0.782777	NA	NA
AT1G14090	0.11016	0.928125	-0.278606	0.68625	NA	NA
AT1G14120	-0.147379	0.855399	-0.074539	0.894389	4	0.0888264
AT1G14130	0.367437	0.576848	0.0207454	0.977098	NA	NA
AT1G14140	-0.0852409	0.909109	-0.11588	0.798252	NA	NA
AT1G14150	-0.0273235	0.964213	-0.454845	0.0730549	16	0.344855
AT1G14170	-0.464472	0.33808	-0.327609	0.397763	NA	NA
AT1G14180	-0.216711	0.71758	-0.0301004	0.954532	NA	NA
AT1G14185	-0.133545	0.923462	-0.764883	0.266379	NA	NA
AT1G14190	-0.282783	0.726501	-1.24149	0.0199203	NA	NA
AT1G14200	-0.348536	0.508585	0.110091	0.80563	NA	NA
AT1G14205	0.977288	0.21906	1.57883	0.00898396	6	0.189328
AT1G14210	0.08901	0.855861	0.0193456	0.959001	NA	NA
AT1G14230	-0.0453692	0.957252	-0.183755	0.662764	NA	NA
AT1G14240	-0.40363	0.760504	-0.537518	0.542746	NA	NA
AT1G14250	0.951173	0.00117903	-2.08896	9.40602e-07	NA	NA
AT1G14270	-0.124796	0.740456	-0.240725	0.301393	NA	NA
AT1G14280	-0.386828	0.0667257	-0.590531	0.00161056	2	0.690158
AT1G14290	-0.30164	0.508589	-0.212791	0.548492	4	0.278411
AT1G14300	-0.0250899	0.975942	0.256369	0.496292	6	0.0762549
AT1G14310	-0.0331455	0.971875	-0.0648003	0.903077	3	0.231654
AT1G14320	-0.0340411	0.932184	0.191904	0.293824	NA	NA
AT1G14330	-0.199129	0.752989	0.026325	0.96085	19.2	0.0787411
AT1G14340	-0.444971	0.412077	-0.0448157	0.935358	NA	NA
AT1G14345	-0.359796	0.112421	-0.362522	0.0485693	16	0.0720678
AT1G14350	-0.263908	0.672432	-0.0867708	0.865322	NA	NA
AT1G14360	0.210436	0.671064	0.326795	0.307445	NA	NA
AT1G14370	0.389424	0.616897	0.741414	0.133891	NA	NA
AT1G14380	0.17153	0.633114	0.0896523	0.756328	8	0.188139
AT1G14400	-0.0262909	0.952212	0.0596499	0.79634	4	0.0527067
AT1G14410	0.341812	0.320645	0.388351	0.136593	NA	NA
AT1G14430	0.448981	0.460176	0.340954	0.476528	NA	NA
AT1G14440	0.29305	0.477714	0.607067	0.0316266	10	0.0525721
AT1G14450	-0.0926838	0.87333	0.36409	0.212217	2	0.0412544
AT1G14460	0.169176	0.684436	-0.136893	0.661621	NA	NA
AT1G14470	-0.475248	0.737023	-0.910043	0.323507	NA	NA
AT1G14510	0.137846	0.682816	0.1991	0.36745	NA	NA
AT1G14520	0.931788	0.212074	0.83341	0.159847	6	0.23288
AT1G14530	0.135899	0.936022	0.197456	0.837453	NA	NA
AT1G14560	-0.155307	0.808741	-0.275313	0.482418	NA	NA
AT1G14570	0.069623	0.878787	0.108163	0.692122	NA	NA
AT1G14580	0.349698	0.159117	0.577299	0.00462081	4	0.112194
AT1G14590	-0.34853	0.584971	-0.237596	0.630592	NA	NA
AT1G14600	-0.217027	0.867573	-0.337661	0.673779	2	0.154943
AT1G14610	0.251094	0.230757	0.191829	0.250426	NA	NA
AT1G14620	-0.121827	0.819826	0.0756723	0.838903	NA	NA
AT1G14630	-0.250279	0.871441	-0.650849	0.465639	NA	NA
AT1G14650	-0.11127	0.746018	0.0978868	0.685055	NA	NA
AT1G14660	-0.151672	0.887069	-0.260933	0.685498	NA	NA
AT1G14670	-0.323164	0.104122	-0.114553	0.529041	12	0.15962
AT1G14685	-0.180953	0.784767	-0.399619	0.311321	10	0.165797
AT1G14687	0.877922	0.534753	1.40217	0.125916	NA	NA
AT1G14690	0.0401689	0.935736	-0.281479	0.209431	NA	NA
AT1G14700	-0.271181	0.270523	-0.598872	0.00315702	0	0.0084642
AT1G14710	-0.0699613	0.87333	-0.0896927	0.743685	14	0.143849
AT1G14720	-0.0786854	0.832273	0.104561	0.652567	14	0.225445
AT1G14730	0.354179	0.721565	0.278984	0.700699	12	0.220131
AT1G14740	-0.0192616	0.968742	0.170651	0.427636	10	0.171354
AT1G14770	-0.304566	0.603336	-0.394189	0.331331	NA	NA
AT1G14780	0.108538	0.950273	0.590778	0.434021	NA	NA
AT1G14790	-0.241165	0.756502	0.24461	0.635484	14	0.0616271
AT1G14810	-0.0483891	0.915562	0.0413281	0.884709	NA	NA
AT1G14820	0.219373	0.731361	0.0827312	0.872717	12	0.129868
AT1G14830	-0.139118	0.584624	-0.0508538	0.812129	NA	NA
AT1G14840	0.160892	0.627536	-0.203469	0.378904	NA	NA
AT1G14850	0.0133309	0.977927	-0.113362	0.631965	NA	NA
AT1G14860	0.0602523	0.975871	0.103105	0.930707	NA	NA
AT1G14870	-0.49071	0.346832	-0.00836796	0.991223	4	0.0978884
AT1G14890	0.0305192	0.959885	-0.025706	0.94413	6	0.00195443
AT1G14900	-0.276622	0.376922	-0.226473	0.352696	NA	NA
AT1G14910	0.0070047	0.990568	-0.0549972	0.869959	NA	NA
AT1G14920	-0.427272	0.144389	-0.629973	0.00958837	10	0.198774
AT1G14970	-0.669013	0.436289	-0.962437	0.131494	NA	NA
AT1G14980	-0.141692	0.572126	0.284734	0.0841265	NA	NA
AT1G14990	-0.391578	0.706432	0.225356	0.766402	NA	NA
AT1G15000	-0.212243	0.701798	-0.275755	0.456653	14	0.0436244
AT1G15002	-0.00349503	0.995021	0.635397	0.0134686	NA	NA
AT1G15020	0.102953	0.883875	-0.12137	0.786951	2	0.149463
AT1G15030	-0.0293578	0.948434	-0.281775	0.14819	0	0.216709
AT1G15040	0.533238	0.556534	0.182604	0.821685	NA	NA
AT1G15060	-0.170031	0.643399	-0.516038	0.0310486	NA	NA
AT1G15080	0.0708985	0.959053	0.534678	0.359361	18	0.157262
AT1G15100	-0.666065	0.0191866	-0.666826	0.00610599	22	0.126299
AT1G15110	0.382774	0.524665	0.468426	0.266564	NA	NA
AT1G15120	0.140351	0.651178	0.481515	0.0141506	NA	NA
AT1G15130	-0.0888491	0.823513	0.0557894	0.840845	NA	NA
AT1G15140	0.0567344	0.907625	-0.175034	0.50503	16	0.224331
AT1G15165	0.0444573	0.981763	0.0544326	0.963002	NA	NA
AT1G15170	-0.273528	0.734493	-0.632121	0.211352	16	0.231797
AT1G15175	-0.0290445	0.981821	-0.560598	0.334584	2	0.386126
AT1G15180	-0.301313	0.315744	-0.567682	0.0151053	NA	NA
AT1G15200	0.027336	0.971875	0.150021	0.694893	NA	NA
AT1G15210	-0.439568	0.397144	-0.124436	0.790635	NA	NA
AT1G15215	-0.554209	0.495876	-0.460462	0.448716	NA	NA
AT1G15220	0.1231	0.905475	-0.159334	0.805519	NA	NA
AT1G15230	0.19609	0.788204	0.397351	0.348997	NA	NA
AT1G15240	-0.108171	0.796809	-0.199313	0.430683	NA	NA
AT1G15250	0.226732	0.585802	0.227005	0.448115	NA	NA
AT1G15260	-0.393688	0.135416	-0.686334	0.0026778	NA	NA
AT1G15270	-0.0204653	0.967874	0.034301	0.900668	2	0.00839416
AT1G15280	0.20996	0.590995	0.15751	0.598693	NA	NA
AT1G15290	-0.0353573	0.930707	-0.355324	0.0495136	22	0.287152
AT1G15300	-0.625254	0.425402	-0.296777	0.648625	NA	NA
AT1G15310	0.869471	0.327962	0.47093	0.550955	NA	NA
AT1G15340	0.639037	0.268806	0.294246	0.574208	NA	NA
AT1G15350	-0.0473008	0.943642	-0.0194044	0.963892	5	0.143872
AT1G15370	0.0082936	0.989269	-0.104561	0.7395	NA	NA
AT1G15380	-0.517977	0.572985	-0.213454	0.778093	NA	NA
AT1G15390	0.0433153	0.925084	0.167015	0.454512	NA	NA
AT1G15400	-0.525336	0.105694	-0.697322	0.0109528	NA	NA
AT1G15405	-0.0932929	0.682278	0.612296	0.000220049	NA	NA
AT1G15410	-0.0449394	0.955729	-0.942334	0.0113107	0	0.142899
AT1G15420	0.0892984	0.903506	0.455199	0.190993	NA	NA
AT1G15430	-0.229348	0.742438	-0.344822	0.445555	13.7143	0.15275
AT1G15440	0.150699	0.705249	0.367616	0.125148	14	0.087803
AT1G15470	-0.112567	0.878787	-0.0649083	0.896321	NA	NA
AT1G15480	0.0244855	0.975942	0.167267	0.676557	12	0.368884
AT1G15490	-0.255981	0.655913	-0.25716	0.529746	NA	NA
AT1G15500	0.210347	0.26088	0.592847	0.000324427	12	0.118688
AT1G15510	0.52849	0.141805	0.790224	0.00690098	NA	NA
AT1G15530	-0.129326	0.853441	0.0438614	0.931379	NA	NA
AT1G15550	0.030563	0.981821	0.0913972	0.904088	NA	NA
AT1G15570	0.141729	0.804986	0.521058	0.0878726	NA	NA
AT1G15660	0.0736854	0.918033	0.183214	0.638033	14	0.117924
AT1G15670	-0.297993	0.608825	0.041013	0.940224	0	0
AT1G15690	-0.0816328	0.749072	0.0916191	0.594676	14	0.162085
AT1G15700	0.0905887	0.918207	0.174726	0.727909	14.4	0.0474441
AT1G15710	-0.353649	0.455068	-0.325565	0.360239	16	0.183995
AT1G15720	0.306902	0.779599	0.679971	0.273969	NA	NA
AT1G15730	0.168914	0.670758	-0.0954116	0.761459	NA	NA
AT1G15740	0.117801	0.816906	-0.268191	0.366763	6	0.380489
AT1G15750	-0.441635	0.0238043	-0.408326	0.0122006	17	0.259744
AT1G15780	-0.0652521	0.876436	-0.107539	0.669138	NA	NA
AT1G15800	0.166111	0.928125	0.643899	0.45355	NA	NA
AT1G15810	0.285755	0.517161	0.196591	0.572747	14	0.242245
AT1G15820	0.27065	0.193196	-0.241052	0.141585	2	0.200075
AT1G15860	0.101915	0.80185	0.36306	0.100154	NA	NA
AT1G15870	-0.323546	0.766182	0.10094	0.903047	NA	NA
AT1G15880	-0.283287	0.425402	-0.0303067	0.933704	6	0.0591695
AT1G15885	-0.161448	0.89373	0.363767	0.571895	NA	NA
AT1G15890	0.0525962	0.971398	0.393982	0.550504	NA	NA
AT1G15910	0.353117	0.306893	0.332597	0.215676	NA	NA
AT1G15920	-0.109842	0.838638	0.0520721	0.890999	NA	NA
AT1G15930	-0.0220028	0.955729	0.294766	0.0693876	NA	NA
AT1G15940	0.495238	0.161541	0.0548047	0.888017	NA	NA
AT1G15950	-0.128097	0.591928	-0.173306	0.288047	22	0.412082
AT1G15960	-0.273495	0.283202	-0.178869	0.38825	17	0.110058
AT1G15970	-0.0935296	0.848741	-0.258392	0.34013	NA	NA
AT1G15980	0.0753495	0.810643	-0.515042	0.0044368	18	0.156767
AT1G16000	0.117044	0.833935	0.533112	0.0624387	4	0.380939
AT1G16010	0.0500483	0.90943	0.222142	0.302011	12	0.204395
AT1G16020	-0.161708	0.707431	-0.290585	0.289254	12	0.154687
AT1G16030	0.517559	0.514703	0.858486	0.106193	NA	NA
AT1G16040	0.108126	0.922087	-0.299077	0.626394	NA	NA
AT1G16060	-0.225021	0.814767	0.0894707	0.896298	0	0.156509
AT1G16080	-0.03824	0.913022	-0.538021	0.00236189	20	0.490478
AT1G16090	0.20415	0.866244	0.0306436	0.974713	NA	NA
AT1G16110	0.225919	0.867411	-0.156963	0.868022	NA	NA
AT1G16170	-0.00490788	0.994609	-0.382531	0.256417	4	0.126887
AT1G16180	-0.101898	0.728531	0.194676	0.276529	NA	NA
AT1G16190	-0.00288696	0.997236	-0.14371	0.727899	NA	NA
AT1G16210	0.191999	0.608825	-0.103421	0.738181	NA	NA
AT1G16220	0.39376	0.75029	0.247069	0.791437	15.4286	0.222588
AT1G16240	0.0523752	0.895412	0.0495271	0.84472	6	0.108636
AT1G16250	0.152334	0.810643	0.022793	0.964885	NA	NA
AT1G16260	-0.119183	0.776862	-0.200724	0.442206	NA	NA
AT1G16270	-0.160943	0.608809	-0.102098	0.677821	NA	NA
AT1G16280	0.0268343	0.975386	0.460948	0.193791	NA	NA
AT1G16300	-0.134726	0.828045	-0.583769	0.0876601	22	0.195548
AT1G16310	0.367199	0.688211	-0.104744	0.895704	NA	NA
AT1G16320	-0.263841	0.2724	-0.418634	0.024658	16	0.218607
AT1G16340	0.188701	0.745056	-0.00278831	0.996258	NA	NA
AT1G16350	0.327426	0.121329	0.494573	0.00537241	14	0.106955
AT1G16390	-0.309544	0.647512	0.213923	0.662311	4	0.276778
AT1G16400	-0.261303	0.624199	-0.36853	0.307445	NA	NA
AT1G16410	-0.251885	0.286706	-0.581849	0.0026778	NA	NA
AT1G16430	0.0583292	0.979069	-0.276517	0.820859	NA	NA
AT1G16445	0.737069	0.36688	1.33187	0.0219545	6	0.239056
AT1G16460	0.290914	0.226574	0.203788	0.293671	NA	NA
AT1G16470	0.0368292	0.922378	0.07323	0.727975	4	0.121364
AT1G16480	0.925746	0.496687	0.269236	0.839207	NA	NA
AT1G16500	-0.513793	0.52915	-0.358246	0.57074	22	0.0190165
AT1G16510	-0.368081	0.833903	-0.342889	0.769123	0	0.134329
AT1G16515	-0.601023	0.550491	-0.417699	0.59008	NA	NA
AT1G16520	0.282092	0.563835	0.0383365	0.937042	18	0.21893
AT1G16540	0.0986104	0.928655	0.0958585	0.885967	NA	NA
AT1G16550	-0.111303	0.952819	-0.0646422	0.955641	NA	NA
AT1G16560	-0.380727	0.229289	-0.464347	0.0582277	10	0.0530766
AT1G16570	-0.0504069	0.954211	0.13718	0.758585	NA	NA
AT1G16590	0.176858	0.928493	0.0812164	0.951617	4	0.0937309
AT1G16610	0.212435	0.770849	0.365456	0.410224	NA	NA
AT1G16630	0.321644	0.639022	0.0858715	0.88698	NA	NA
AT1G16635	-0.161069	0.799475	0.482041	0.151257	NA	NA
AT1G16650	-0.330035	0.746073	-0.388362	0.574154	NA	NA
AT1G16670	-0.283484	0.598828	-0.51273	0.158118	NA	NA
AT1G16680	-0.0973613	0.899155	0.0744342	0.879247	NA	NA
AT1G16690	0.292825	0.660646	0.239998	0.629879	NA	NA
AT1G16700	0.082197	0.812282	0.356637	0.0536153	NA	NA
AT1G16710	0.0784108	0.81973	-0.134776	0.521203	NA	NA
AT1G16720	-0.0152272	0.966526	-0.29938	0.0412788	18.8571	0.297258
AT1G16730	-0.0577131	0.931351	-0.499842	0.103036	22	0.866779
AT1G16740	0.341831	0.471164	0.217395	0.573227	2	0.0712991
AT1G16750	-0.290815	0.608825	-0.591494	0.121561	18	0.284275
AT1G16780	0.180592	0.771671	0.111128	0.808543	16	0.0946911
AT1G16790	0.40266	0.269027	0.730666	0.00920809	NA	NA
AT1G16800	0.26493	0.603537	0.0421719	0.931271	NA	NA
AT1G16810	0.211735	0.515469	0.118991	0.656024	6	0.337397
AT1G16825	-0.000972034	0.99909	-0.287518	0.737892	NA	NA
AT1G16840	0.181706	0.678911	0.25841	0.371054	12	0.183113
AT1G16858	-0.100694	0.805789	0.0346056	0.911547	NA	NA
AT1G16860	-0.122332	0.784046	-0.0181583	0.960691	11	0.0347743
AT1G16870	-0.0263221	0.965982	0.153014	0.593177	12	0.0482389
AT1G16880	-0.0599043	0.856783	-0.240856	0.161548	16	0.458684
AT1G16890	-0.0665215	0.873538	-0.244193	0.263894	NA	NA
AT1G16900	0.360345	0.420525	0.383295	0.24779	NA	NA
AT1G16916	0.348232	0.579486	0.420982	0.334339	NA	NA
AT1G16920	0.165022	0.655913	0.327003	0.160899	NA	NA
AT1G16930	-0.595677	0.441913	-0.325942	0.604501	NA	NA
AT1G16960	0.0918335	0.935539	-0.202335	0.746726	NA	NA
AT1G16970	0.129298	0.808046	0.0627857	0.872609	12	0.175643
AT1G17020	-0.120193	0.913749	-0.200751	0.760775	NA	NA
AT1G17040	-0.101863	0.891457	-0.0668045	0.892388	NA	NA
AT1G17050	-0.0519916	0.86356	-0.504576	0.00237117	22	0.61313
AT1G17060	0.025314	0.984037	-0.313086	0.64248	0	0.224607
AT1G17070	0.287055	0.741725	-0.368606	0.553675	NA	NA
AT1G17080	0.10064	0.815725	0.0304765	0.927511	NA	NA
AT1G17090	-0.722459	0.486826	-1.39072	0.0723446	10.2857	0.607121
AT1G17100	-0.736006	0.00714214	-0.412207	0.0546662	16	0.626133
AT1G17110	-0.107157	0.755586	-0.16004	0.468942	NA	NA
AT1G17120	-0.280489	0.378095	-0.44323	0.0600064	NA	NA
AT1G17130	0.431615	0.287498	0.241787	0.489341	NA	NA
AT1G17140	-0.208763	0.726501	-0.396322	0.289543	0	0.0589603
AT1G17145	0.500346	0.329205	0.240412	0.599513	8	0.0167595
AT1G17147	0.248301	0.858239	0.466549	0.56012	8	0.798732
AT1G17160	-0.128277	0.820798	-0.107596	0.780214	NA	NA
AT1G17170	-0.0629324	0.937709	-0.171141	0.690644	NA	NA
AT1G17180	-0.0926734	0.955729	-0.157631	0.865386	NA	NA
AT1G17190	0.0365575	0.963991	-0.0960952	0.824671	NA	NA
AT1G17200	-0.0849975	0.783367	0.0912167	0.657287	4	0.148847
AT1G17210	-0.196491	0.447394	-0.0737332	0.746444	NA	NA
AT1G17220	0.242244	0.239026	-0.249042	0.121094	16	0.198822
AT1G17230	-0.0106121	0.99002	-0.253418	0.517952	NA	NA
AT1G17255	-1.20876	0.197948	-0.216506	0.799672	NA	NA
AT1G17270	0.305393	0.697344	0.283033	0.614436	NA	NA
AT1G17280	-0.111742	0.816906	-0.313191	0.248753	NA	NA
AT1G17290	0.336944	0.125429	0.195472	0.289907	10	0.122561
AT1G17330	0.289561	0.805052	-0.05438	0.955928	3	0.168022
AT1G17340	-0.00524824	0.990568	0.0522042	0.825785	12	0.0625721
AT1G17350	0.540217	0.389932	0.177402	0.765814	4	0.139157
AT1G17360	0.239501	0.322828	0.131239	0.525544	20	0.223569
AT1G17370	-0.207209	0.324354	-0.261174	0.10074	18	0.181783
AT1G17410	0.0974469	0.947463	0.10747	0.899423	NA	NA
AT1G17420	0.414844	0.423585	0.536999	0.15143	NA	NA
AT1G17430	-0.0598496	0.969555	0.18776	0.812192	NA	NA
AT1G17440	-0.207545	0.652506	-0.484662	0.102008	NA	NA
AT1G17450	0.0691947	0.897676	-0.203754	0.486302	NA	NA
AT1G17455	-0.217757	0.828045	0.329454	0.573227	NA	NA
AT1G17460	0.105727	0.936406	0.00330714	0.997188	12	0.353218
AT1G17470	-0.0166582	0.969555	0.348876	0.0447375	12	0.175617
AT1G17480	-0.666521	0.522969	-0.0268267	0.980682	NA	NA
AT1G17490	-0.0214707	0.982405	-0.056034	0.924248	NA	NA
AT1G17500	0.0403324	0.947766	0.0541086	0.876558	NA	NA
AT1G17510	-0.010025	0.992928	0.346167	0.510589	NA	NA
AT1G17520	0.505288	0.319767	0.147736	0.765869	NA	NA
AT1G17530	-0.0473289	0.968138	-0.440888	0.404555	NA	NA
AT1G17550	0.0209141	0.967608	-0.153052	0.507757	NA	NA
AT1G17560	-0.154372	0.868481	0.449552	0.34448	NA	NA
AT1G17580	0.100813	0.730875	0.0597495	0.785787	NA	NA
AT1G17590	0.0151301	0.991711	-0.013061	0.991424	NA	NA
AT1G17600	0.465047	0.652974	0.953449	0.129795	NA	NA
AT1G17620	-0.22336	0.617063	0.00542089	0.992094	14	0.110641
AT1G17630	-0.396402	0.821285	0.451086	0.661003	NA	NA
AT1G17640	0.686573	0.554303	0.821121	0.310417	NA	NA
AT1G17650	-0.116837	0.770849	0.115799	0.668084	NA	NA
AT1G17680	0.483813	0.336244	0.167006	0.727913	14	0.118295
AT1G17690	-0.161107	0.685819	-0.0974433	0.748493	NA	NA
AT1G17710	-1.39267	0.143393	-0.7413	0.322552	NA	NA
AT1G17720	0.140737	0.601608	0.0683752	0.756904	NA	NA
AT1G17730	0.0528083	0.92477	-0.095362	0.764642	3	0.043219
AT1G17744	-0.801905	0.409662	-0.138634	0.876696	NA	NA
AT1G17745	-0.266565	0.49576	-0.334969	0.228959	18	0.564343
AT1G17750	-0.185113	0.877265	0.183397	0.804412	NA	NA
AT1G17760	0.468087	0.214922	0.313672	0.311084	NA	NA
AT1G17780	-0.0330357	0.968379	-0.374439	0.296382	NA	NA
AT1G17790	-0.147163	0.779599	-0.354732	0.254938	NA	NA
AT1G17820	0.0935605	0.871891	0.0459331	0.910778	NA	NA
AT1G17830	-0.0668621	0.940088	0.0662062	0.900668	NA	NA
AT1G17840	-0.315616	0.0919408	-0.145702	0.369937	16	0.166101
AT1G17850	0.672467	0.169018	0.739929	0.0530229	NA	NA
AT1G17860	0.0201574	0.979823	0.278148	0.428029	4	0.148929
AT1G17870	-1.4173	0.00159275	-1.94571	2.92045e-05	20	0.326154
AT1G17880	0.111632	0.664813	0.166287	0.322425	NA	NA
AT1G17890	-0.0494495	0.936882	0.0163626	0.967517	NA	NA
AT1G17920	-0.197861	0.828045	-0.418874	0.437152	NA	NA
AT1G17930	0.0966242	0.913749	-0.0138611	0.985018	NA	NA
AT1G17940	-0.208725	0.771527	-0.370229	0.408507	12	0.504981
AT1G17970	0.676326	0.072493	0.391591	0.223134	8	0.406331
AT1G17980	0.114597	0.830942	-0.100655	0.783842	NA	NA
AT1G17990	0.172261	0.753016	-0.452671	0.185111	NA	NA
AT1G18000	-0.123919	0.775404	-0.50447	0.0461219	NA	NA
AT1G18010	0.00441149	0.993828	-0.379206	0.128904	NA	NA
AT1G18020	0.199582	0.73556	-0.351473	0.366989	NA	NA
AT1G18030	-0.26984	0.748989	0.0717734	0.914344	NA	NA
AT1G18040	-0.183836	0.800394	0.156306	0.746891	14	0.286958
AT1G18060	-0.0296818	0.938206	-0.591428	0.0015269	0	0.441941
AT1G18070	-0.0100056	0.978764	-0.0860489	0.64192	NA	NA
AT1G18080	-0.0711068	0.783971	0.148715	0.327657	16	0.0583002
AT1G18090	0.696412	0.099844	0.937521	0.00752043	NA	NA
AT1G18100	0.308587	0.796809	0.972108	0.12143	NA	NA
AT1G18150	0.336165	0.178658	0.07186	0.773965	10	0.333014
AT1G18160	0.309477	0.180755	0.193006	0.313082	NA	NA
AT1G18170	0.0407313	0.943823	0.20437	0.449496	16	0.137417
AT1G18180	-0.356537	0.813621	-0.562537	0.557083	15.4286	0.219396
AT1G18190	0.283299	0.640044	-0.0407126	0.944147	NA	NA
AT1G18210	-0.421668	0.19628	-0.430509	0.0912675	NA	NA
AT1G18250	-0.294332	0.676806	-0.613028	0.179986	NA	NA
AT1G18260	-0.0612891	0.890668	-0.000962771	0.997758	12	0.212426
AT1G18265	1.83173	0.0211848	1.01795	0.149902	10	0.522345
AT1G18270	-0.00916935	0.982209	0.202859	0.236122	NA	NA
AT1G18300	-0.0265419	0.975625	0.308945	0.407099	NA	NA
AT1G18330	0.740466	0.00762989	1.09272	7.67825e-05	6	0.925381
AT1G18335	0.849753	0.183169	0.977833	0.0488337	NA	NA
AT1G18340	-0.0292767	0.97608	-0.135013	0.793942	NA	NA
AT1G18360	0.516142	0.0886332	-0.328714	0.214914	4	0.242133
AT1G18370	0.27091	0.540315	0.528964	0.0702242	NA	NA
AT1G18390	-0.293028	0.749147	0.0475797	0.951617	NA	NA
AT1G18415	0.385763	0.749236	0.759801	0.285091	NA	NA
AT1G18440	0.368765	0.530675	0.362248	0.397752	NA	NA
AT1G18450	-0.0764522	0.828859	-0.111681	0.614611	10	0.0265407
AT1G18460	0.105046	0.686649	-0.141226	0.41735	2	0.255523
AT1G18470	0.00629458	0.990628	0.0947981	0.749842	10	0.195124
AT1G18480	-0.262863	0.609512	0.217963	0.555095	NA	NA
AT1G18485	0.55218	0.26506	0.188076	0.692723	14	0.100268
AT1G18490	0.29162	0.56822	0.135257	0.753385	NA	NA
AT1G18500	-0.023658	0.958352	-0.234203	0.22766	NA	NA
AT1G18540	0.0979828	0.673854	0.174169	0.240018	NA	NA
AT1G18550	-0.175849	0.824118	-0.154397	0.772464	NA	NA
AT1G18560	-0.0421656	0.972952	-0.191047	0.771709	NA	NA
AT1G18570	0.467243	0.704333	0.649014	0.415623	8	0.395419
AT1G18580	-0.146087	0.740113	-0.153269	0.614417	12	0.060023
AT1G18590	-0.21876	0.545382	-0.790033	0.00313398	0	0.186684
AT1G18600	0.45096	0.285321	0.240679	0.51246	NA	NA
AT1G18610	0.262263	0.575491	0.325307	0.316812	18	0.110773
AT1G18620	0.496404	0.0213032	-0.034923	0.884662	5	0.301107
AT1G18630	0.00118179	0.998895	0.369411	0.614069	NA	NA
AT1G18640	-0.00446937	0.994489	0.12925	0.700992	6	0.121927
AT1G18650	-0.0984591	0.82872	-0.0551687	0.864343	NA	NA
AT1G18660	-0.601178	0.0597582	-0.983883	0.000847098	18	0.0498461
AT1G18670	-0.0277206	0.964219	-0.297945	0.268768	NA	NA
AT1G18680	-0.367709	0.655913	-0.27369	0.655784	2	0.0581149
AT1G18690	-0.0816679	0.935736	0.045865	0.943127	NA	NA
AT1G18700	0.0367288	0.943722	0.0590317	0.839923	10	0
AT1G18710	0.512626	0.171394	-0.793508	0.0150487	NA	NA
AT1G18720	0.0871806	0.840642	0.24103	0.30286	14	0.211339
AT1G18730	-0.0320927	0.94471	-0.933438	0.000158512	NA	NA
AT1G18740	0.146605	0.657257	0.509278	0.0142893	4	0.254208
AT1G18745	-0.152405	0.862853	-0.263785	0.621128	NA	NA
AT1G18750	-0.533258	0.536566	0.0704128	0.929344	NA	NA
AT1G18773	0.744148	0.592772	0.314107	0.798166	NA	NA
AT1G18800	0.297224	0.358501	0.294963	0.232777	NA	NA
AT1G18810	-0.198341	0.524466	-0.569846	0.0100594	0	0.32848
AT1G18830	0.98887	0.253847	0.312604	0.720428	NA	NA
AT1G18840	-0.370359	0.236577	-0.553112	0.025663	12	0.185985
AT1G18850	0.129463	0.807801	0.610524	0.0309212	NA	NA
AT1G18870	-0.00696491	0.994616	-0.59234	0.224302	NA	NA
AT1G18880	-0.264208	0.514703	0.0786873	0.822203	NA	NA
AT1G18890	0.0641904	0.903506	0.18976	0.494001	NA	NA
AT1G18900	-0.55413	0.0412599	-0.0652117	0.813394	NA	NA
AT1G18910	-0.66786	0.176051	-0.989194	0.0149645	NA	NA
AT1G18940	-0.877589	0.420172	-0.361186	0.6877	NA	NA
AT1G18950	0.0797294	0.871891	-0.0320827	0.929124	NA	NA
AT1G18980	-0.31146	0.82872	0.505909	0.533809	NA	NA
AT1G19000	-0.230735	0.287629	-0.462434	0.00718645	20.5714	0.090954
AT1G19010	0.410495	0.428922	0.327586	0.421065	NA	NA
AT1G19020	0.530873	0.719011	0.466874	0.660702	2	0.279278
AT1G19025	0.13241	0.949379	0.152772	0.897229	NA	NA
AT1G19050	-0.608537	0.175599	-1.17609	0.00294765	4	0.242735
AT1G19080	0.39055	0.593254	0.224135	0.70657	NA	NA
AT1G19100	0.250691	0.630116	0.418893	0.215676	NA	NA
AT1G19110	-0.0614448	0.846036	-0.229074	0.173079	NA	NA
AT1G19120	-0.0592947	0.927902	-0.101655	0.785771	4	0.159692
AT1G19130	-0.197471	0.71407	0.0242718	0.959135	NA	NA
AT1G19140	-0.179774	0.635961	-0.0957748	0.749743	22	0.3808
AT1G19150	0.0217476	0.962023	-0.421413	0.0243636	NA	NA
AT1G19170	-0.0159321	0.981621	0.0287388	0.94413	NA	NA
AT1G19180	0.0646796	0.967885	0.410698	0.561636	NA	NA
AT1G19200	0.238861	0.887155	0.492387	0.601285	NA	NA
AT1G19220	0.415168	0.323481	0.00959926	0.987413	NA	NA
AT1G19230	0.35661	0.686649	0.0469988	0.954898	NA	NA
AT1G19240	0.0383906	0.975006	0.36331	0.512761	NA	NA
AT1G19270	0.274001	0.663604	0.469664	0.23879	NA	NA
AT1G19290	0.580467	0.373377	0.328032	0.560973	NA	NA
AT1G19300	-0.170991	0.884294	-0.0220636	0.981715	14	0.0975351
AT1G19310	-0.0115673	0.992274	0.324967	0.585575	10	0.308969
AT1G19330	-0.261805	0.556822	-0.573529	0.0596674	NA	NA
AT1G19340	-0.280697	0.825217	-0.641448	0.399176	NA	NA
AT1G19350	-0.335662	0.192997	-0.269639	0.187091	NA	NA
AT1G19360	-0.319108	0.286664	-0.172022	0.496761	NA	NA
AT1G19370	0.303614	0.655236	0.841142	0.0399298	12	0.55829
AT1G19380	0.154034	0.932786	1.0364	0.162595	4	0.381095
AT1G19400	-0.0141717	0.974882	-0.347041	0.0639314	NA	NA
AT1G19430	-0.14629	0.71407	-0.397352	0.104564	NA	NA
AT1G19440	-0.0819492	0.890985	-0.118853	0.744332	NA	NA
AT1G19450	-0.0173618	0.971875	-0.417091	0.0410756	22	0.413458
AT1G19480	-0.0261584	0.974882	-0.0973653	0.827496	NA	NA
AT1G19485	0.349072	0.547666	0.0371783	0.950558	NA	NA
AT1G19490	-0.717424	0.0693253	-1.37987	0.000387463	11	0.368228
AT1G19520	-0.16809	0.655913	0.0265697	0.938672	14	0.178824
AT1G19530	-0.74127	0.302728	-0.696104	0.211485	NA	NA
AT1G19550	-0.0771428	0.942931	-0.367208	0.488811	NA	NA
AT1G19570	-0.0687782	0.862048	-0.393925	0.050495	NA	NA
AT1G19580	-0.209836	0.487788	-0.0409683	0.883567	NA	NA
AT1G19600	0.0316199	0.952819	-0.0951943	0.730651	6	0.0252932
AT1G19610	0.480301	0.835324	2.31583	0.0231733	NA	NA
AT1G19640	-1.14696	0.306327	-0.687191	0.43374	22	0.825375
AT1G19650	0.0907476	0.822726	-0.344316	0.124956	NA	NA
AT1G19660	0.288246	0.156709	-0.375114	0.0240349	NA	NA
AT1G19670	0.437942	0.19399	0.562429	0.032919	NA	NA
AT1G19680	0.116733	0.781298	0.238992	0.334131	NA	NA
AT1G19690	-0.931353	0.142013	-1.04106	0.0429202	NA	NA
AT1G19700	-0.200677	0.454824	-0.509761	0.00972192	18	0.105086
AT1G19710	-0.292873	0.51698	-0.591295	0.0601379	NA	NA
AT1G19715	0.0331253	0.944931	-0.511132	0.017291	NA	NA
AT1G19720	0.104712	0.782209	-0.226206	0.313082	NA	NA
AT1G19730	0.0705028	0.92452	0.0299925	0.952623	NA	NA
AT1G19740	0.221766	0.342148	0.173288	0.351182	10	0.157795
AT1G19770	0.195854	0.544966	0.148599	0.551232	8	0.319908
AT1G19800	-0.247373	0.332955	-0.226746	0.250267	NA	NA
AT1G19835	0.106891	0.706432	0.141475	0.451813	NA	NA
AT1G19850	-0.115615	0.772015	-0.26257	0.270604	NA	NA
AT1G19860	0.107654	0.800828	0.0613203	0.84299	NA	NA
AT1G19870	0.109519	0.758196	0.00522994	0.98983	NA	NA
AT1G19880	0.219081	0.622512	0.201396	0.537657	NA	NA
AT1G19900	-0.842573	0.522876	0.362408	0.713131	NA	NA
AT1G19910	-0.105482	0.685819	0.0336293	0.875277	4	0.117431
AT1G19920	-0.354028	0.0899438	-0.37304	0.0284595	18	0.440677
AT1G19940	-0.727572	0.651178	-0.0903494	0.948913	NA	NA
AT1G19950	-0.319686	0.828045	-0.759286	0.383778	NA	NA
AT1G19960	0.460353	0.549645	1.20877	0.0150393	0	0.171061
AT1G19970	-0.0120974	0.989269	-0.399144	0.313206	22	0.307242
AT1G19980	-0.0589036	0.956123	-0.152193	0.789652	NA	NA
AT1G19990	0.251182	0.782537	0.155872	0.813652	NA	NA
AT1G20010	0.54542	0.0289971	0.575924	0.00658412	10	0.56123
AT1G20020	0.665763	0.00714214	-0.136507	0.544586	12	0.252402
AT1G20030	1.00173	0.112421	0.57337	0.299521	8	0.26871
AT1G20050	-0.0715451	0.830183	0.0963204	0.645274	NA	NA
AT1G20060	-0.0804597	0.958333	-0.297932	0.70515	NA	NA
AT1G20070	0.501284	0.227687	0.396843	0.234675	NA	NA
AT1G20090	0.101911	0.755862	0.241683	0.21316	NA	NA
AT1G20100	0.140142	0.688995	0.110804	0.667768	NA	NA
AT1G20110	-0.170173	0.567749	-0.32801	0.101863	NA	NA
AT1G20140	0.696507	0.0906468	0.848763	0.0121292	NA	NA
AT1G20160	-0.0824525	0.867285	-0.543941	0.0354998	NA	NA
AT1G20190	-0.111022	0.769964	-0.105815	0.686643	8	0.340605
AT1G20200	-0.0404	0.9036	0.319121	0.0429202	NA	NA
AT1G20220	0.245301	0.744309	0.263694	0.611109	NA	NA
AT1G20225	-0.0271286	0.968742	0.0335874	0.934491	NA	NA
AT1G20230	-0.481286	0.64603	-0.469731	0.532053	NA	NA
AT1G20260	0.0192068	0.956401	-0.273356	0.0609729	NA	NA
AT1G20270	0.0283521	0.976701	0.123243	0.812129	NA	NA
AT1G20300	-0.214458	0.75029	-0.0847224	0.871411	13	0.0974211
AT1G20330	-0.230078	0.318477	-0.371893	0.0331217	22.2857	0.0638489
AT1G20340	-0.220096	0.31419	-0.699483	0.000264184	NA	NA
AT1G20370	-0.0573853	0.922087	0.40465	0.115887	8.57143	0.284015
AT1G20380	0.107475	0.910909	-0.00509225	0.995449	NA	NA
AT1G20390	0.675559	0.172363	0.690258	0.0751948	NA	NA
AT1G20410	0.355756	0.550491	0.511237	0.204479	12	0.0791561
AT1G20430	-0.0939127	0.867573	0.37555	0.181872	NA	NA
AT1G20440	0.146514	0.740588	0.150041	0.625539	10	0.294059
AT1G20450	0.0912248	0.853879	0.348534	0.172953	10	0.541925
AT1G20460	0.0371264	0.974771	-0.131453	0.836803	NA	NA
AT1G20470	-0.52645	0.35399	-1.3537	0.00479208	20	0.496507
AT1G20480	0.702261	0.5045	0.710242	0.355848	NA	NA
AT1G20490	-0.414254	0.789641	-0.198275	0.85965	NA	NA
AT1G20510	0.210091	0.694992	0.266483	0.455288	NA	NA
AT1G20540	0.497709	0.21906	0.506825	0.107176	NA	NA
AT1G20550	0.134668	0.913673	-0.0386695	0.964837	NA	NA
AT1G20560	-0.0746301	0.905098	-0.781698	0.0144638	NA	NA
AT1G20575	0.0380541	0.96266	-0.183038	0.644806	4	0.0656128
AT1G20580	0.353243	0.374609	-0.0635678	0.875107	2	0.103079
AT1G20610	0.21551	0.816288	0.145569	0.822898	NA	NA
AT1G20620	0.605193	0.129921	0.858578	0.00945026	10	0.563237
AT1G20630	0.869909	0.0652087	0.970577	0.0126816	10	0.36709
AT1G20640	0.257322	0.251798	-0.0062805	0.983443	NA	NA
AT1G20650	0.0907839	0.790052	-0.071532	0.764642	4	0.20953
AT1G20670	-0.0776964	0.896793	-0.122156	0.733233	NA	NA
AT1G20690	-0.0428819	0.971398	-0.457445	0.394513	NA	NA
AT1G20691	-0.4167	0.582159	-0.12827	0.840475	NA	NA
AT1G20693	0.503685	0.0176798	0.508383	0.00477857	8	0.31496
AT1G20696	0.0870756	0.809175	0.0259069	0.926643	10	0.318162
AT1G20720	0.206558	0.855244	-0.0705702	0.935358	NA	NA
AT1G20760	-0.15702	0.581067	-0.146591	0.479788	NA	NA
AT1G20770	0.206716	0.665098	0.461413	0.116696	4	0.0433645
AT1G20780	-0.179653	0.680295	0.048282	0.894038	NA	NA
AT1G20810	0.167384	0.575491	-0.235219	0.262236	NA	NA
AT1G20816	0.148386	0.806876	-0.113309	0.79316	NA	NA
AT1G20823	-0.453296	0.424523	-0.197093	0.685339	21	0.285161
AT1G20830	0.00789657	0.990568	-0.26401	0.369377	16	0.392137
AT1G20840	-0.266034	0.565966	0.0995954	0.79634	14	0.284322
AT1G20850	-0.204235	0.490175	-0.535106	0.0120246	10	0.0946132
AT1G20870	0.0996233	0.926875	-0.196999	0.750192	18	0.0451868
AT1G20880	-0.143662	0.855759	-0.462085	0.283214	NA	NA
AT1G20890	-0.271197	0.815616	0.231718	0.756563	4	0.0931081
AT1G20900	-0.731037	0.420525	-0.0148212	0.990704	NA	NA
AT1G20910	0.0967815	0.862048	0.439864	0.112334	NA	NA
AT1G20920	0.730498	0.0889078	0.42729	0.246018	NA	NA
AT1G20930	-0.324972	0.706432	-0.490328	0.390155	NA	NA
AT1G20950	-0.503179	0.0245848	-0.380318	0.0374168	13.7143	0.137177
AT1G20960	0.268204	0.471007	0.298611	0.267128	NA	NA
AT1G20970	-0.0115722	0.979443	-0.119207	0.577213	NA	NA
AT1G20980	0.0277506	0.940088	-0.0115943	0.961351	NA	NA
AT1G21000	-0.163141	0.660861	-0.348646	0.141302	NA	NA
AT1G21010	-0.0474495	0.944414	-0.146978	0.680238	6	0.143787
AT1G21050	-0.196642	0.582875	0.0619827	0.8391	1	0.388529
AT1G21060	-0.286437	0.451966	-0.380253	0.16769	NA	NA
AT1G21065	0.137998	0.616406	-0.315505	0.0816199	0	0.275417
AT1G21070	-0.291721	0.58612	-0.290181	0.451813	NA	NA
AT1G21080	-0.165736	0.608825	-0.242181	0.269478	20	0.272598
AT1G21090	0.367526	0.776553	-0.27075	0.785812	NA	NA
AT1G21100	-0.142437	0.799663	-0.0299914	0.947674	8	0.539796
AT1G21110	0.267542	0.746844	0.609096	0.208001	NA	NA
AT1G21120	0.478432	0.704311	0.826415	0.281998	NA	NA
AT1G21130	0.731498	0.00332916	0.919052	9.42705e-05	8	0.801916
AT1G21150	0.249933	0.864678	0.784678	0.28345	NA	NA
AT1G21160	0.307244	0.524437	-0.0897334	0.839564	NA	NA
AT1G21170	-0.0536829	0.943186	-0.106467	0.798088	NA	NA
AT1G21190	0.0330448	0.959341	-0.124753	0.704799	NA	NA
AT1G21200	0.0227881	0.981821	-0.202729	0.692122	NA	NA
AT1G21250	-0.144751	0.907625	2.12827	0.000254136	NA	NA
AT1G21260	0.693123	0.331006	0.665815	0.227387	NA	NA
AT1G21270	0.0956959	0.901015	0.757742	0.0311892	4	0.364796
AT1G21280	-0.00271644	0.997525	0.112174	0.822954	8.57143	0.170866
AT1G21310	-0.00843258	0.992933	0.251197	0.585575	NA	NA
AT1G21350	0.231381	0.630904	0.136524	0.720678	NA	NA
AT1G21370	0.0890855	0.915136	0.0208767	0.971546	NA	NA
AT1G21380	-0.00587572	0.990568	0.0609276	0.818873	NA	NA
AT1G21390	0.38274	0.739863	1.18352	0.062669	NA	NA
AT1G21400	-0.276884	0.397642	-0.710289	0.00505843	NA	NA
AT1G21410	-0.0778016	0.86356	-0.310482	0.190511	22	0.236357
AT1G21440	-0.0751018	0.881082	-0.269735	0.301393	0	0.0763685
AT1G21450	0.244254	0.278939	-0.0309702	0.895855	NA	NA
AT1G21460	-0.0455421	0.958333	-5.82611e-05	0.999766	NA	NA
AT1G21480	0.181434	0.746684	-0.0812316	0.855947	NA	NA
AT1G21500	0.171535	0.626889	-0.492625	0.0327343	4	0.406242
AT1G21520	3.1669	0.0693253	2.33944	0.129137	NA	NA
AT1G21525	-2.02074	0.437367	0.381274	0.833916	NA	NA
AT1G21540	0.0164802	0.990628	-0.377755	0.629839	NA	NA
AT1G21560	-0.188961	0.686829	-0.800198	0.00994207	NA	NA
AT1G21580	-0.150565	0.677241	-0.350411	0.122723	NA	NA
AT1G21590	0.141509	0.634289	-0.122675	0.576327	NA	NA
AT1G21600	0.458906	0.0552353	0.4667	0.0178353	12	0.324325
AT1G21610	0.156596	0.776553	0.372405	0.239869	12	0.184093
AT1G21630	-0.169805	0.549645	-0.214429	0.276752	NA	NA
AT1G21640	0.256366	0.249404	0.218473	0.215196	NA	NA
AT1G21650	0.0853514	0.903506	-0.00794598	0.990791	16	0.251145
AT1G21651	-0.214504	0.88148	-0.361498	0.679088	NA	NA
AT1G21660	-0.158684	0.603054	-0.0559698	0.827208	NA	NA
AT1G21670	0.166873	0.618817	0.379811	0.0746947	12	0.625889
AT1G21680	-0.0225511	0.955729	0.000220685	0.999184	12	0.853025
AT1G21690	-0.0532308	0.934808	0.262747	0.373489	NA	NA
AT1G21700	-0.0101649	0.982405	-0.0439852	0.864866	NA	NA
AT1G21710	0.192582	0.749028	0.321294	0.391271	NA	NA
AT1G21720	-0.0340424	0.939313	0.10568	0.650126	5	0.0687047
AT1G21730	0.348328	0.36688	0.176625	0.598309	8	0.177456
AT1G21740	-0.293503	0.719262	0.105942	0.866127	NA	NA
AT1G21750	0.216626	0.329205	0.436135	0.0101244	12	0.22106
AT1G21760	-0.0150156	0.978799	-0.050264	0.873327	NA	NA
AT1G21770	0.162796	0.637585	0.325168	0.14129	4	0.191576
AT1G21780	-0.0913333	0.810705	0.0178994	0.953802	NA	NA
AT1G21790	0.0742999	0.932786	-0.095978	0.853732	8	0.0369405
AT1G21810	0.251286	0.852981	0.143388	0.879261	NA	NA
AT1G21830	0.00594278	0.994075	0.0813743	0.860604	5.53846	0.127282
AT1G21840	-0.121186	0.931832	0.103291	0.903475	NA	NA
AT1G21880	-0.126715	0.878787	0.189826	0.696488	16	0.340318
AT1G21900	0.0248525	0.964282	0.209829	0.389708	NA	NA
AT1G21910	-0.361893	0.802736	0.116892	0.911804	NA	NA
AT1G21920	0.025288	0.955729	-0.0123989	0.964837	4	0.28884
AT1G21930	0.388096	0.286706	0.41882	0.135916	NA	NA
AT1G21980	-0.0593671	0.931351	-0.267087	0.428925	NA	NA
AT1G22020	-0.289227	0.335798	-0.189276	0.438218	NA	NA
AT1G22030	0.19295	0.841544	0.126219	0.850552	NA	NA
AT1G22040	-0.0953663	0.88517	0.00722463	0.991223	NA	NA
AT1G22050	-0.223506	0.713219	0.0822562	0.862908	4	0.103632
AT1G22060	-0.602573	0.0104351	-0.806066	0.0002889	NA	NA
AT1G22065	-0.804771	0.389902	-0.0549722	0.953971	NA	NA
AT1G22070	0.354335	0.450405	0.391413	0.253117	10	0.476155
AT1G22140	0.0531007	0.926107	0.034718	0.924194	0	0.260999
AT1G22160	-0.436902	0.531217	-1.29662	0.0132376	0	0.258512
AT1G22170	-0.171382	0.872112	-0.472303	0.427832	NA	NA
AT1G22180	0.176441	0.860783	0.120424	0.860564	4	0.182562
AT1G22190	-0.55204	0.241904	-0.507505	0.169768	NA	NA
AT1G22200	-0.0193649	0.971991	0.143077	0.577376	NA	NA
AT1G22220	0.718576	0.440222	1.23549	0.0509129	15.4286	0.107835
AT1G22230	0.283667	0.854555	0.41212	0.661636	NA	NA
AT1G22250	-0.144332	0.904924	0.346462	0.589958	NA	NA
AT1G22270	-0.151813	0.678961	0.219001	0.355324	NA	NA
AT1G22280	0.164016	0.881292	0.251298	0.702342	NA	NA
AT1G22300	0.0937506	0.818818	-0.112544	0.672077	NA	NA
AT1G22310	0.65972	0.164652	0.589984	0.119817	NA	NA
AT1G22330	0.14993	0.844351	-0.178293	0.723698	10	0.460443
AT1G22350	0.280938	0.852953	0.181928	0.860604	NA	NA
AT1G22360	0.0543195	0.937709	0.401137	0.186537	8	0.273926
AT1G22370	0.345033	0.60684	-0.400852	0.428029	12	0.621731
AT1G22400	-0.429474	0.578333	-0.00359345	0.996732	6	0.374308
AT1G22410	-0.228969	0.233329	-0.00879667	0.968221	NA	NA
AT1G22430	0.50603	0.0219606	0.0562098	0.811531	NA	NA
AT1G22440	-0.538553	0.239162	-0.0283621	0.955379	NA	NA
AT1G22450	-0.010731	0.978745	-0.0645034	0.757018	NA	NA
AT1G22490	0.714872	0.494442	0.0551386	0.961333	NA	NA
AT1G22500	0.241065	0.526349	0.482254	0.0571518	NA	NA
AT1G22510	0.0475955	0.972952	-0.30827	0.668207	2	0.0402485
AT1G22520	0.124136	0.809858	0.285296	0.329452	NA	NA
AT1G22530	0.186503	0.717667	0.549104	0.069245	10	0.226412
AT1G22540	-0.138994	0.843453	-0.397735	0.309571	10	0.295119
AT1G22550	-0.0485928	0.954873	-0.00980479	0.988061	10	0.190194
AT1G22570	1.72243	0.00349132	0.941853	0.0503515	8	0.741783
AT1G22590	0.0550885	0.936299	-0.469888	0.136023	NA	NA
AT1G22610	-0.0433429	0.917447	-0.0168671	0.953418	NA	NA
AT1G22620	0.0489404	0.936882	-0.0365913	0.924309	NA	NA
AT1G22630	0.118543	0.752757	-0.348553	0.122612	NA	NA
AT1G22640	0.402691	0.3277	0.123179	0.754228	6	0.384824
AT1G22650	0.256158	0.724372	0.516479	0.234132	22	0.215512
AT1G22660	0.124353	0.841514	0.113051	0.783842	NA	NA
AT1G22690	0.0614067	0.895086	0.117475	0.662067	NA	NA
AT1G22700	0.710889	0.0180501	0.645486	0.00992212	NA	NA
AT1G22710	0.0210825	0.96266	0.129515	0.528527	NA	NA
AT1G22730	0.0365922	0.950273	0.189608	0.476652	NA	NA
AT1G22740	0.763953	0.23986	0.639305	0.222287	8	0.629922
AT1G22750	0.079954	0.855251	0.0684563	0.812129	2	0.166331
AT1G22770	0.377919	0.164145	0.643891	0.00386801	10	0.485034
AT1G22780	-0.00350564	0.993421	0.250817	0.175893	4	0.112747
AT1G22790	-0.203604	0.700489	-0.338784	0.321643	NA	NA
AT1G22800	0.218437	0.678911	0.0143333	0.979246	NA	NA
AT1G22830	-0.154622	0.896894	-0.0415961	0.96084	NA	NA
AT1G22840	0.0362184	0.928125	0.323097	0.0689248	NA	NA
AT1G22850	-0.218627	0.398421	-0.434445	0.0232564	22	0.325499
AT1G22860	-0.146746	0.820922	-0.290731	0.450362	NA	NA
AT1G22870	0.211401	0.646765	-0.190059	0.585334	NA	NA
AT1G22880	0.319879	0.709077	0.33926	0.567615	NA	NA
AT1G22882	0.386937	0.388791	0.0113172	0.984518	NA	NA
AT1G22885	-0.249663	0.841544	-0.737391	0.301393	4	0.049185
AT1G22890	-0.456054	0.411815	0.050796	0.926498	8	0.709519
AT1G22900	-0.141941	0.903506	-0.0249151	0.977568	NA	NA
AT1G22910	-0.385368	0.308089	-0.423196	0.144183	NA	NA
AT1G22920	0.0714027	0.882496	0.198216	0.445888	NA	NA
AT1G22930	-0.249917	0.270116	-0.321175	0.0629987	NA	NA
AT1G22940	0.269828	0.41551	0.182168	0.497638	NA	NA
AT1G22950	-0.0584868	0.919687	-0.0445019	0.903786	NA	NA
AT1G22960	0.0251263	0.981224	0.146666	0.789059	NA	NA
AT1G22970	0.0488671	0.935909	0.391737	0.132545	6	0.0800353
AT1G22985	-0.0330888	0.979823	-0.0743888	0.924248	NA	NA
AT1G22990	0.198063	0.898106	0.108261	0.91743	6	0.396039
AT1G23000	0.42595	0.589125	0.544898	0.311147	10	0.123773
AT1G23010	-0.00332315	0.998042	0.621482	0.342168	NA	NA
AT1G23020	-0.611552	0.18428	-1.5257	0.000490731	NA	NA
AT1G23030	-0.210912	0.590995	0.299659	0.244324	6	0.0917671
AT1G23040	-0.727266	0.433286	-0.443461	0.55003	NA	NA
AT1G23050	0.360182	0.811585	0.475746	0.620705	0	0.159911
AT1G23052	-0.432313	0.771972	0.0882851	0.941133	NA	NA
AT1G23080	0.345395	0.153739	0.327228	0.0889208	9	0.271771
AT1G23090	-0.392483	0.490906	0.314499	0.436808	20	0.095103
AT1G23100	0.136302	0.879229	0.953522	0.0237536	4	0.140115
AT1G23110	-0.516127	0.728468	0.348719	0.730651	21	0.465978
AT1G23120	0.156074	0.925764	0.138705	0.891311	6	0.162674
AT1G23130	-0.00657645	0.989269	0.00728692	0.983012	NA	NA
AT1G23140	-0.0118294	0.993828	0.225209	0.787499	NA	NA
AT1G23149	-0.729907	0.55742	-1.00226	0.261468	NA	NA
AT1G23150	0.29681	0.819965	0.486735	0.533479	NA	NA
AT1G23170	-0.200174	0.790052	-0.00278137	0.997043	NA	NA
AT1G23180	0.22045	0.550649	0.668854	0.00756753	NA	NA
AT1G23190	-0.313284	0.113383	-0.281993	0.0772701	18	0.225582
AT1G23200	0.45487	0.672043	0.781065	0.242231	NA	NA
AT1G23205	-0.473541	0.233277	-0.287664	0.375631	18	0.701173
AT1G23220	-0.0785553	0.9036	-0.117027	0.765387	1	0.110424
AT1G23230	-0.075113	0.858001	-0.120054	0.638467	NA	NA
AT1G23260	-0.0963067	0.816288	-0.242524	0.301418	4	0.169688
AT1G23280	0.370334	0.299966	0.419518	0.122344	NA	NA
AT1G23290	-0.0121916	0.975115	0.262967	0.103084	NA	NA
AT1G23310	0.00679967	0.984536	-0.316978	0.0351477	NA	NA
AT1G23330	-0.095187	0.878787	-0.140095	0.713131	NA	NA
AT1G23340	-0.376083	0.653322	-0.877206	0.113032	NA	NA
AT1G23360	-0.377533	0.472025	-0.217488	0.609415	NA	NA
AT1G23380	0.435419	0.534753	-0.200888	0.748418	NA	NA
AT1G23390	0.628097	0.197948	0.510131	0.188003	6	1.53097
AT1G23400	0.522288	0.0327839	0.300498	0.139841	12	0.254058
AT1G23410	-0.830149	0.0725146	0.064023	0.892668	NA	NA
AT1G23440	-0.0651598	0.873538	0.0486516	0.857842	NA	NA
AT1G23460	0.0428365	0.968477	-0.301658	0.557988	NA	NA
AT1G23480	-0.0252279	0.96919	0.0425931	0.907103	6	0.192736
AT1G23490	0.147611	0.624082	0.150402	0.482837	4	0.10364
AT1G23530	-0.735971	0.346965	-0.309146	0.643883	NA	NA
AT1G23550	-0.750458	0.472025	-0.883631	0.248673	22	0.423999
AT1G23710	-0.0861256	0.913749	-0.39028	0.329661	NA	NA
AT1G23730	0.0829232	0.963838	0.331669	0.712286	NA	NA
AT1G23740	-0.103549	0.740374	-0.695406	0.000758198	22	0.49141
AT1G23750	-0.087973	0.929096	-0.632804	0.180742	NA	NA
AT1G23780	-0.380408	0.109557	-0.125101	0.567615	NA	NA
AT1G23790	-0.167094	0.88555	0.427659	0.476867	NA	NA
AT1G23800	-0.258783	0.607497	-0.629909	0.0615395	NA	NA
AT1G23820	0.199605	0.442926	0.312012	0.0907549	NA	NA
AT1G23830	-0.431123	0.678234	-0.641462	0.358138	NA	NA
AT1G23860	-0.00595772	0.992979	0.128319	0.719496	NA	NA
AT1G23870	-0.0454803	0.935736	0.31398	0.201407	8	0.291634
AT1G23880	-0.556069	0.522391	-0.747917	0.227661	20	0.073496
AT1G23890	-0.0275088	0.979666	0.0582931	0.925963	NA	NA
AT1G23900	-0.152875	0.60462	0.0358152	0.889091	NA	NA
AT1G23935	0.451945	0.755033	0.875176	0.30083	NA	NA
AT1G23950	0.0519261	0.903722	0.0859354	0.735515	NA	NA
AT1G23960	-0.0644945	0.890985	0.0621716	0.834655	NA	NA
AT1G23970	-0.112194	0.90724	0.332243	0.498091	NA	NA
AT1G23980	-0.431591	0.689015	-0.495454	0.504089	NA	NA
AT1G24020	-0.0742628	0.803347	-0.231283	0.163558	22	0.117986
AT1G24030	-0.0494527	0.976095	-0.139276	0.880425	17.1429	0
AT1G24040	0.156106	0.656173	-0.130517	0.622493	NA	NA
AT1G24050	0.0879577	0.821728	-0.118149	0.638779	NA	NA
AT1G24070	0.118667	0.938206	-0.831442	0.282313	18	0.649939
AT1G24090	0.494048	0.749147	1.11054	0.204725	NA	NA
AT1G24095	0.67968	0.622512	0.38243	0.737892	NA	NA
AT1G24100	-0.317468	0.23394	-0.378975	0.0656619	NA	NA
AT1G24120	0.324027	0.315153	0.26056	0.306898	NA	NA
AT1G24145	0.371107	0.78546	0.654015	0.420011	NA	NA
AT1G24147	-0.0804926	0.927869	-0.17	0.731969	0	0.253936
AT1G24148	0.0311574	0.954031	-0.436676	0.0557366	NA	NA
AT1G24150	-0.0341468	0.975047	0.17735	0.748493	NA	NA
AT1G24160	0.549108	0.0911169	0.332712	0.227417	10	0.187662
AT1G24170	-0.331627	0.227182	0.0834046	0.746891	NA	NA
AT1G24180	-0.167367	0.677839	-0.0945762	0.761359	NA	NA
AT1G24190	0.0284122	0.949055	0.17886	0.362004	NA	NA
AT1G24240	-0.147222	0.908873	0.0432422	0.960981	NA	NA
AT1G24260	1.2225	0.274659	2.82538	0.00078005	NA	NA
AT1G24265	0.106075	0.926875	0.719964	0.146362	NA	NA
AT1G24267	-0.0373984	0.937858	0.0656414	0.807493	NA	NA
AT1G24280	-0.292222	0.657257	-0.246743	0.611568	20	0.227046
AT1G24290	-0.489586	0.726501	0.189125	0.854159	NA	NA
AT1G24300	0.241255	0.335798	0.107979	0.63069	NA	NA
AT1G24310	0.0973704	0.897676	0.202009	0.638478	16	0.142673
AT1G24330	0.375271	0.521773	0.160171	0.752527	NA	NA
AT1G24340	-0.0639678	0.888446	-0.208256	0.390822	NA	NA
AT1G24350	0.33658	0.571046	0.425954	0.295538	NA	NA
AT1G24360	-0.0468416	0.886325	-0.0934461	0.624084	12	0.0542729
AT1G24400	-0.191599	0.867573	-0.29905	0.672846	NA	NA
AT1G24430	-0.936272	0.25167	-0.728392	0.254938	NA	NA
AT1G24440	0.357629	0.421577	0.395622	0.229377	6	0.243252
AT1G24450	0.153159	0.814241	-0.0699154	0.885028	NA	NA
AT1G24460	0.323415	0.19399	0.00574045	0.987439	NA	NA
AT1G24490	0.105331	0.809413	0.080076	0.790837	14	0.135599
AT1G24510	0.0901092	0.746073	0.170231	0.317493	NA	NA
AT1G24530	0.327952	0.669369	1.01521	0.0259884	NA	NA
AT1G24560	-0.0528294	0.925531	-0.228454	0.404375	NA	NA
AT1G24575	0.241947	0.748437	-0.472686	0.340986	NA	NA
AT1G24580	-0.749142	0.019217	-1.34532	8.21426e-05	22	0.687286
AT1G24610	0.00660352	0.990623	0.112912	0.711066	NA	NA
AT1G24625	0.0340659	0.959885	-0.16318	0.625919	10	0.203271
AT1G24706	0.0612636	0.866199	0.150823	0.451813	NA	NA
AT1G24764	0.023862	0.969662	-0.468991	0.0734601	NA	NA
AT1G24793	-0.039534	0.976256	-0.775288	0.198813	NA	NA
AT1G24800	-0.127595	0.782537	0.150305	0.614675	NA	NA
AT1G24822	-0.289793	0.678911	-0.0626845	0.915894	NA	NA
AT1G24880	0.115443	0.881741	0.357733	0.374491	NA	NA
AT1G24881	0.0275015	0.958333	0.0841372	0.756292	NA	NA
AT1G24996	-0.122081	0.825061	-0.290936	0.361957	NA	NA
AT1G25054	0.741329	0.341361	0.0732381	0.934891	NA	NA
AT1G25055	-0.237895	0.523577	0.0555778	0.867043	NA	NA
AT1G25097	0.190787	0.796809	0.0693256	0.903475	NA	NA
AT1G25098	0.125796	0.70381	-0.0967246	0.694273	NA	NA
AT1G25145	0.450838	0.590995	0.012728	0.991223	NA	NA
AT1G25150	-0.326425	0.450134	-0.237779	0.480411	NA	NA
AT1G25175	-0.0224727	0.976263	-0.0926775	0.820559	NA	NA
AT1G25210	1.26293	0.0993712	0.731839	0.280918	NA	NA
AT1G25211	-0.194673	0.61968	0.164538	0.562156	NA	NA
AT1G25220	-0.401264	0.31955	-0.154478	0.665155	NA	NA
AT1G25230	0.155728	0.733198	0.0741787	0.834724	8	0.702284
AT1G25260	0.050948	0.896894	0.388559	0.0382032	NA	NA
AT1G25275	0.248462	0.602675	0.431783	0.164974	6	0.136324
AT1G25280	-0.110919	0.796214	0.123662	0.656767	16	0.242702
AT1G25290	0.115378	0.857862	-0.16683	0.682263	NA	NA
AT1G25320	0.184106	0.876772	0.478271	0.446263	12	0.183211
AT1G25350	0.0923199	0.767975	0.0141594	0.957536	NA	NA
AT1G25360	0.348709	0.852981	-0.234121	0.863605	NA	NA
AT1G25370	0.402352	0.752942	0.759735	0.312242	NA	NA
AT1G25375	-0.103353	0.903506	-0.00301913	0.996628	NA	NA
AT1G25380	-0.10574	0.852526	0.204038	0.523319	16	0.126944
AT1G25390	-0.287323	0.454363	-0.0413264	0.911547	16	0.190364
AT1G25420	-0.0524445	0.91696	-0.349036	0.147464	2	0.0950801
AT1G25425	-0.22635	0.846536	-0.875327	0.181573	NA	NA
AT1G25440	0.0301916	0.940088	-0.591646	0.00192802	NA	NA
AT1G25450	-0.0183958	0.978745	0.2413	0.429113	NA	NA
AT1G25470	0.287616	0.704311	0.672809	0.134548	NA	NA
AT1G25472	0.160803	0.828691	0.284129	0.519426	NA	NA
AT1G25480	-0.231151	0.799507	-1.14397	0.0366962	NA	NA
AT1G25490	0.00970232	0.981821	0.199109	0.267044	14	0.105672
AT1G25500	-0.614301	0.406295	-0.774022	0.161364	NA	NA
AT1G25510	-0.112863	0.904328	0.239032	0.643257	NA	NA
AT1G25520	0.138125	0.815725	0.275881	0.421839	2	0.110019
AT1G25530	-0.475453	0.514498	-0.658689	0.203506	NA	NA
AT1G25540	0.24544	0.429669	0.257539	0.265729	NA	NA
AT1G25550	-0.0428454	0.95134	-0.0734743	0.849707	10	0.100331
AT1G25560	0.329805	0.665098	0.639217	0.177558	7	0.243941
AT1G25570	-0.0866962	0.83423	-0.0139047	0.965703	14	0
AT1G25580	-0.0175262	0.982209	-0.043626	0.926113	NA	NA
AT1G25682	0.32786	0.424309	0.278052	0.38038	NA	NA
AT1G26090	0.333197	0.44182	0.233652	0.501395	NA	NA
AT1G26100	0.241019	0.721735	-0.105313	0.847176	NA	NA
AT1G26110	-0.253523	0.599471	-0.166067	0.658122	NA	NA
AT1G26120	-0.114204	0.841544	0.0599996	0.879261	10	0.176776
AT1G26130	0.272943	0.509386	0.111213	0.757431	NA	NA
AT1G26150	0.522055	0.0906468	0.577537	0.0224381	NA	NA
AT1G26160	0.135081	0.817768	0.219236	0.538607	NA	NA
AT1G26170	-0.00314497	0.995142	-0.137973	0.621936	NA	NA
AT1G26180	0.206946	0.662842	0.21443	0.519978	15	0.0989242
AT1G26190	0.22491	0.64689	0.193435	0.592342	NA	NA
AT1G26208	-0.474261	0.513646	-0.825024	0.109041	18.8571	0.300631
AT1G26210	0.0749373	0.931351	-0.706084	0.085603	1	0.123575
AT1G26218	-0.389217	0.285321	-0.631217	0.0268945	NA	NA
AT1G26220	-0.342001	0.401813	-0.719912	0.0203662	22	0.293959
AT1G26230	-0.0283317	0.963603	0.205175	0.452657	15	0.380684
AT1G26260	0.271519	0.853073	0.265103	0.780677	NA	NA
AT1G26270	-0.0558489	0.899155	0.139893	0.560973	14	0.279498
AT1G26300	-0.201112	0.764575	-0.0157876	0.980038	NA	NA
AT1G26330	-0.155605	0.900054	-0.0488742	0.955641	NA	NA
AT1G26340	-0.00549057	0.994679	0.356863	0.335094	NA	NA
AT1G26370	-0.0920058	0.833599	-0.131024	0.634517	14	0.0852207
AT1G26440	0.357621	0.605145	0.642499	0.151436	6	0.271099
AT1G26450	0.578243	0.568196	0.536661	0.471413	NA	NA
AT1G26460	-0.117625	0.746734	0.151652	0.522035	NA	NA
AT1G26470	-0.0429204	0.95454	0.242858	0.464047	NA	NA
AT1G26500	-0.538239	0.716542	-0.406223	0.70515	NA	NA
AT1G26520	0.356251	0.647512	0.158386	0.805632	NA	NA
AT1G26540	-0.503981	0.684482	-0.186772	0.847909	NA	NA
AT1G26550	0.233488	0.486826	0.320924	0.17278	NA	NA
AT1G26560	-0.157775	0.601786	-0.486609	0.0161631	20	0.4614
AT1G26570	-0.291794	0.667735	-0.298637	0.534318	10.2857	0.231272
AT1G26580	0.48135	0.142328	-0.0119267	0.978413	10	0.0526271
AT1G26600	-0.802186	0.58895	-0.245525	0.83838	NA	NA
AT1G26620	0.218578	0.597697	0.11802	0.726591	NA	NA
AT1G26630	-0.025232	0.938545	0.0486779	0.789241	NA	NA
AT1G26640	0.223977	0.611295	-0.00607483	0.991308	NA	NA
AT1G26650	-0.13132	0.768947	-0.105537	0.738848	NA	NA
AT1G26660	-0.163352	0.922378	0.0451619	0.967424	NA	NA
AT1G26665	-0.201461	0.796214	0.357984	0.421588	12	0.340795
AT1G26670	-0.303706	0.254621	-0.223919	0.293462	8	0.18614
AT1G26690	0.401444	0.344258	0.237939	0.509278	NA	NA
AT1G26730	-0.150149	0.934598	-0.329642	0.744746	NA	NA
AT1G26740	0.0130387	0.989193	0.163091	0.731704	NA	NA
AT1G26750	0.309389	0.462504	0.419383	0.159737	NA	NA
AT1G26761	0.33309	0.46066	-0.166475	0.674826	2	0.229381
AT1G26770	-0.127633	0.817768	-0.120705	0.744905	16	0.372059
AT1G26800	0.228706	0.797856	-0.116393	0.863382	6	0.39322
AT1G26810	0.319421	0.734493	0.342947	0.595668	NA	NA
AT1G26820	-0.268781	0.731588	-0.499799	0.313924	NA	NA
AT1G26830	-0.086219	0.77678	0.0460161	0.837695	NA	NA
AT1G26840	0.34936	0.755141	0.536223	0.44095	NA	NA
AT1G26850	-0.164004	0.462692	-0.0962576	0.596082	14	0.15056
AT1G26880	0.0773768	0.810643	0.139254	0.471413	NA	NA
AT1G26900	-0.337979	0.728282	-0.2812	0.686406	NA	NA
AT1G26910	-0.0793912	0.871718	0.135451	0.638467	NA	NA
AT1G26920	0.472747	0.0434569	0.167516	0.424307	6	0.260341
AT1G26930	0.410178	0.608825	0.272669	0.667226	4	0.0365412
AT1G26940	0.316326	0.709234	0.465599	0.392175	NA	NA
AT1G26945	-0.268751	0.592772	-0.605286	0.0738369	6	0.744538
AT1G26960	-0.0987623	0.936299	-0.233609	0.728492	NA	NA
AT1G27000	0.0563582	0.882245	0.0442062	0.86057	NA	NA
AT1G27020	1.15723	0.274659	1.18144	0.145265	NA	NA
AT1G27030	-0.225502	0.606315	-0.179224	0.585191	NA	NA
AT1G27050	0.321964	0.590995	0.266364	0.557213	2	0.130811
AT1G27060	0.181697	0.887963	-0.470124	0.538351	NA	NA
AT1G27070	0.013174	0.985068	-0.358985	0.268668	NA	NA
AT1G27090	-0.290651	0.586345	-0.157397	0.71324	10	0.0438226
AT1G27100	-0.186859	0.506434	-0.108323	0.635189	NA	NA
AT1G27120	0.0427957	0.936356	-0.122662	0.665715	22	0.334885
AT1G27130	-0.243329	0.453493	-0.0623709	0.834458	NA	NA
AT1G27150	-0.218829	0.625196	0.0457412	0.90768	6	0.157305
AT1G27170	-0.376481	0.498474	0.220603	0.604802	NA	NA
AT1G27180	-0.304041	0.465462	0.0264743	0.950766	NA	NA
AT1G27190	-0.227486	0.549343	-0.390353	0.131247	8	0.0745385
AT1G27200	-0.522115	0.203061	-0.451348	0.163156	NA	NA
AT1G27210	0.263608	0.415087	-0.270794	0.274062	6	0.217968
AT1G27285	1.19592	0.28334	0.237989	0.848147	NA	NA
AT1G27290	-0.0340912	0.948354	-0.0958829	0.726591	7	0.252093
AT1G27300	-0.155499	0.803347	-0.168325	0.685352	NA	NA
AT1G27310	0.149941	0.548329	0.333829	0.0445803	4	0.04033
AT1G27320	-0.173742	0.479689	-0.330383	0.0539202	NA	NA
AT1G27330	0.0392978	0.955729	0.173652	0.609415	2	0.184691
AT1G27340	0.0617012	0.896242	0.228764	0.335144	16	0.157833
AT1G27350	0.141052	0.739478	0.260145	0.316169	NA	NA
AT1G27360	-0.215807	0.694368	-0.445966	0.2021	16	0.459252
AT1G27370	-0.0672657	0.923462	-0.0743139	0.859356	20	0.239483
AT1G27385	-0.0897382	0.892803	-0.285626	0.423143	20.5714	0.125374
AT1G27390	0.312256	0.23394	0.253279	0.226805	NA	NA
AT1G27400	0.257007	0.236577	0.13552	0.464047	NA	NA
AT1G27410	0.295125	0.769581	0.517988	0.391368	5.14286	0.0693756
AT1G27430	-0.00871108	0.986458	0.0311903	0.91592	NA	NA
AT1G27435	0.271092	0.429296	0.297133	0.239693	NA	NA
AT1G27440	-0.101414	0.924413	-0.00433895	0.996258	NA	NA
AT1G27450	-0.0314119	0.958333	0.0795281	0.800924	NA	NA
AT1G27460	0.215585	0.591024	0.0344742	0.928071	8	0.28192
AT1G27470	0.222615	0.517449	0.491147	0.0338893	14	0.0439681
AT1G27480	-0.302621	0.164236	-0.542802	0.00317861	14	0.465492
AT1G27500	-0.0487798	0.952819	0.316345	0.371583	NA	NA
AT1G27510	0.246031	0.339482	0.448884	0.0206939	NA	NA
AT1G27520	0.380031	0.32127	0.0552189	0.890654	NA	NA
AT1G27530	0.135514	0.746311	-0.0266164	0.94184	NA	NA
AT1G27540	0.351386	0.212372	0.487545	0.025953	NA	NA
AT1G27580	0.320048	0.559566	0.332124	0.399055	NA	NA
AT1G27590	0.551476	0.350083	0.455219	0.328783	NA	NA
AT1G27595	-0.0184573	0.978799	0.0842745	0.81986	NA	NA
AT1G27600	0.03684	0.945291	0.0477653	0.876558	10	0.220604
AT1G27630	0.284622	0.672432	0.061507	0.917755	12	0.335176
AT1G27650	0.0988726	0.764442	0.228106	0.238221	10	0.0959897
AT1G27660	0.0107612	0.994616	-0.528568	0.532074	NA	NA
AT1G27680	-0.0429762	0.964213	-0.652741	0.119706	16	0.0588575
AT1G27690	-0.143365	0.700134	-0.0163982	0.960691	14	0.163914
AT1G27695	-0.0467865	0.982209	-0.0919206	0.943412	4	0.101217
AT1G27700	0.0187119	0.981779	-0.0436942	0.928071	NA	NA
AT1G27730	0.180292	0.937132	0.395009	0.746075	NA	NA
AT1G27750	0.041789	0.955729	0.112688	0.774861	NA	NA
AT1G27752	-0.249637	0.437661	-0.5212	0.0272546	NA	NA
AT1G27760	-0.214228	0.468403	-0.139974	0.553946	18	0.270983
AT1G27770	-0.20921	0.639022	0.27481	0.348213	NA	NA
AT1G27840	0.111445	0.874355	-0.0446175	0.931102	NA	NA
AT1G27850	-0.214477	0.378572	-0.233194	0.202092	16	0.0215015
AT1G27880	-0.169466	0.906091	-0.0640301	0.94934	NA	NA
AT1G27900	0.0413791	0.955522	0.285314	0.369109	16	0.125548
AT1G27910	0.0410002	0.943805	-0.0776825	0.811345	NA	NA
AT1G27920	0.503863	0.527286	0.0939502	0.903764	NA	NA
AT1G27921	0.574969	0.461793	0.468955	0.437951	NA	NA
AT1G27930	0.372085	0.0960598	0.300317	0.100812	8	0.276962
AT1G27940	0.0642865	0.955906	-0.266948	0.653758	NA	NA
AT1G27950	-0.320796	0.081805	-0.393545	0.0100105	20	0.132268
AT1G27960	-0.00147916	0.998895	-0.0756157	0.924248	NA	NA
AT1G27970	0.0561255	0.898106	-0.0256096	0.933704	NA	NA
AT1G27980	-0.0507366	0.948002	-0.154161	0.700699	NA	NA
AT1G28010	-0.31914	0.515648	0.0643609	0.883137	NA	NA
AT1G28060	0.775817	0.052449	0.385594	0.266693	NA	NA
AT1G28070	-0.233637	0.852981	0.0215828	0.984288	NA	NA
AT1G28090	-0.0126428	0.990568	-0.211574	0.715118	10	0.108574
AT1G28100	0.59814	0.195467	0.297309	0.464037	NA	NA
AT1G28110	-0.118193	0.873603	-0.40891	0.303237	15.4286	0.098319
AT1G28120	-0.0392627	0.931264	0.0656056	0.79731	NA	NA
AT1G28130	-0.325837	0.327765	0.303823	0.220692	3	0.0109684
AT1G28140	0.134853	0.674258	-0.185973	0.390822	NA	NA
AT1G28150	0.218459	0.690902	-0.0150819	0.978569	10	0.212806
AT1G28190	0.0449676	0.980892	0.385047	0.668084	8	0.274728
AT1G28200	-0.063831	0.932266	-0.0830683	0.849793	NA	NA
AT1G28210	-0.541988	0.572126	0.35397	0.607538	8	0.0444947
AT1G28230	0.0574852	0.951768	0.141455	0.775581	10.2857	0.384371
AT1G28240	-0.231686	0.564361	-0.273819	0.332189	NA	NA
AT1G28250	0.163765	0.773988	0.140118	0.727706	4	0.0610004
AT1G28260	0.23441	0.590387	0.483637	0.0851257	10	0.0837116
AT1G28280	-0.00180831	0.998008	0.0822972	0.845326	NA	NA
AT1G28290	-0.204332	0.594489	-0.131447	0.66134	NA	NA
AT1G28310	-0.249128	0.717489	-0.375696	0.402832	10	0.0319872
AT1G28320	0.479388	0.144389	0.363926	0.174484	10	0.0634092
AT1G28330	0.119912	0.824031	0.311513	0.294957	12	1.04722
AT1G28340	0.207371	0.5045	0.076514	0.778446	NA	NA
AT1G28350	0.105293	0.820904	0.363553	0.143499	14	0.0541502
AT1G28380	-0.36758	0.248829	-0.209425	0.429118	16	0.0790659
AT1G28390	-0.0707106	0.955131	-0.000809211	0.999171	15.4286	0.20558
AT1G28395	0.573568	0.463409	0.464715	0.442584	NA	NA
AT1G28400	-0.128359	0.615394	-0.761932	0.000180925	NA	NA
AT1G28410	0.250566	0.623638	0.429009	0.195289	NA	NA
AT1G28420	-0.0547112	0.888045	-0.115373	0.604814	NA	NA
AT1G28440	-0.261714	0.221223	-0.108376	0.567278	NA	NA
AT1G28470	0.105153	0.952311	-0.809734	0.341378	NA	NA
AT1G28490	0.289546	0.496044	-0.112662	0.76799	NA	NA
AT1G28510	0.167867	0.773436	0.222048	0.557083	NA	NA
AT1G28520	-0.122537	0.749236	-0.149162	0.562859	11	0.0968908
AT1G28530	0.0497986	0.963025	0.152589	0.782777	10	0.10388
AT1G28540	0.255888	0.72979	-0.0857378	0.888501	4	0.302606
AT1G28560	-0.418718	0.580778	-1.43679	0.0109823	12	0.392967
AT1G28570	-0.390063	0.612593	-0.713533	0.175152	20	0.56912
AT1G28580	-0.336694	0.373163	-0.0825161	0.81486	16	0.14546
AT1G28600	-0.229293	0.419227	0.143316	0.530821	18	0.227315
AT1G28610	0.369847	0.285321	-0.01599	0.968367	13.7143	0.126416
AT1G28660	-0.366277	0.645863	-0.425341	0.440035	NA	NA
AT1G28670	-0.242834	0.487209	0.0885896	0.767438	NA	NA
AT1G28680	-0.0236306	0.968459	0.0155836	0.964923	18	0.269144
AT1G28685	-0.160366	0.84303	0.0991921	0.857354	NA	NA
AT1G28710	0.0647354	0.955729	0.0197118	0.980307	NA	NA
AT1G28760	-0.121998	0.917822	-0.461936	0.453357	NA	NA
AT1G28960	-0.0252159	0.971398	-0.447488	0.131613	NA	NA
AT1G29020	-0.304734	0.888606	0.926424	0.352122	NA	NA
AT1G29025	-0.480203	0.600613	0.43887	0.470836	NA	NA
AT1G29030	0.27258	0.651178	0.848179	0.0209181	12	0.233376
AT1G29040	0.0210161	0.976137	-0.0609795	0.877142	0	0.112358
AT1G29050	-0.155659	0.656803	-0.024086	0.940577	17.1429	0.099854
AT1G29060	0.18845	0.784317	0.0964651	0.851449	NA	NA
AT1G29070	0.0296328	0.931832	0.0290548	0.88797	NA	NA
AT1G29071	0.263673	0.711039	0.5955	0.164492	NA	NA
AT1G29120	-0.308436	0.327765	-0.477206	0.0472785	16	0.327975
AT1G29150	-0.035461	0.913022	0.399264	0.00962046	NA	NA
AT1G29170	-0.176975	0.640044	-0.184089	0.49449	NA	NA
AT1G29220	0.367095	0.564815	0.712875	0.085341	NA	NA
AT1G29240	0.187881	0.867573	0.525631	0.377426	14	0.262511
AT1G29250	-0.155006	0.573416	0.204336	0.274285	NA	NA
AT1G29260	0.0588443	0.931301	0.307752	0.324331	NA	NA
AT1G29280	-0.35849	0.586129	0.458642	0.280453	NA	NA
AT1G29300	-0.219392	0.767724	-0.161746	0.760372	NA	NA
AT1G29310	0.105636	0.805052	-0.0926969	0.75493	NA	NA
AT1G29320	0.31781	0.581152	0.201352	0.661621	NA	NA
AT1G29330	-0.351518	0.491786	-0.0582152	0.902732	NA	NA
AT1G29340	-0.0752542	0.855759	0.140143	0.560973	NA	NA
AT1G29350	0.0896123	0.797606	0.178325	0.386065	NA	NA
AT1G29357	0.10194	0.952205	-0.35241	0.695182	NA	NA
AT1G29370	0.151576	0.670446	0.175083	0.472694	NA	NA
AT1G29380	-0.242274	0.848591	-0.250901	0.760838	NA	NA
AT1G29390	-0.0644712	0.922378	-0.619247	0.0472567	NA	NA
AT1G29395	-0.243485	0.734428	-1.79398	0.00097617	9	1.07881
AT1G29400	-0.0712174	0.805052	-0.255646	0.109041	12	0.0934977
AT1G29410	0.242233	0.769657	-0.431626	0.425065	NA	NA
AT1G29418	-0.345118	0.425075	0.720958	0.0197259	NA	NA
AT1G29420	0.285382	0.684436	-0.107081	0.856977	4	0.651858
[truncated: 15,977 more rows]

## Sheet: SupTable02
Supplementary Table 2. Genes up-regulated in xct-2 are enriched for regulation by g irradiation and UV-B but not for regulation by non-damaging light treatments.
The percentage of genes upregulated in both xct-2 and in response to the indicated treatments are shown, along with the statistical significance of the observed degree of overlap (Fisher’s exact test).
comparison	% xct-2 genes	% trt genes	p value
white, 45 mina + xct-2	0	0	0.2752
red, 45 mina + xct-2	0.0206186	0.010929	0.72
blue, 45 mina + xct-2	0.0104167	0.00515464	0.7251
far-red, 45 mina + xct-2	0	0	0.4126
UV-A, 45 mina + xct-2	0.0416667	0.0121581	0.59
UV-A/B, 45 mina + xct-2	0.09375	0.0194384	0.057
white, 4hra + xct-2	0.03125	0.00390117	0.06312
red, 4hra + xct-2	0.0103093	0.00176367	0.03
blue, 4hra + xct-2	0.0515464	0.00512295	0.09465
far-red, 4hra + xct-2	0.0625	0.00528169	0.08355
UV-A, 4hra + xct-2	0	0	0.2752
UV-A/B, 4hra + xct-2	0.0729167	0.0116667	0.6764
UV-B, 1hrb + xct-2	0.166667	0.0561404	3.827e-11
UV-B, 3hrb + xct-2	0.364583	0.0469169	< 2.2e-16
UV-B, 6hrb + xct-2	0.416667	0.0389864	< 2.2e-16
UV-B, 24hrb + xct-2	0.333333	0.161616	< 2.2e-16
g irradiation, peak induction at 3 hrc + xct-2	0.214765	0.0701754	1.1e-15
a(Peschke and Kretsch, 2011)
b(Kilian et al., 2007)
c(Bourbosse et al., 2018)

## Sheet: SupTable03
Supplementary Table 3. Primers used in this study.
Target	Forward primer	Reverse primer	Purpose
ARD3	GGACTCGGACAACTATATGAAGGC	GGGCGATTATAAGCAGTCCACAC	qPCR
LURP1	TGATAACGAGTGCGGACGGTAAG	TGTCATGCATGGTCATCATCTTCC	qPCR
PNP-A	TTACGACCCTCCCTACACTAGGTC	TGTAGCACCAATGCATCGAACCC	qPCR
PP2A	TAACGTGGCCAAAATGATGC	GTTCTCCACAACCGATTGGT	qPCR
PR1	CTAAGGGTTCACAACCAGGC	AAGGCCCACCAGAGTGTATG	qPCR
